# Supplementary material for: Olefin cross metathesis based de novo synthesis of a partially protected L-amicetose and a fully protected L-cinerulose derivative
Source: PubMed Central journal article supplement (PMC4077472; doi:10.3762/bjoc.10.102), 2014-05-06

## Supporting Information File 2

for

# **Olefin cross metathesis based de novo synthesis of a partially protected L-amicetose and a fully protected L-cinerulose derivative**

Bernd Schmidt\* and Sylvia Hauke

Address: Institut für Chemie, Organische Synthesechemie, Universität Potsdam,  
Karl-Liebknecht-Straße 24–25, 14476 Potsdam-Golm, Germany

Email: Bernd Schmidt - [bernd.schmidt@uni-potsdam.de](mailto:bernd.schmidt@uni-potsdam.de)

\* Corresponding author

**Copies of  $^1\text{H}$  and  $^{13}\text{C}$  NMR spectra**

## Table of Contents

|                                                                                                                                                             |     |
|-------------------------------------------------------------------------------------------------------------------------------------------------------------|-----|
| $^1\text{H}$ NMR ( $\text{CDCl}_3$ , 500 MHz) of <b>8</b>                                                                                                   | S3  |
| $^{13}\text{C}$ NMR ( $\text{CDCl}_3$ , 125 MHz) of <b>8</b>                                                                                                | S4  |
| $^1\text{H}$ NMR ( $\text{CDCl}_3$ , 300 MHz) of <b>9</b>                                                                                                   | S5  |
| $^{13}\text{C}$ NMR ( $\text{CDCl}_3$ , 75 MHz) of <b>9</b>                                                                                                 | S6  |
| $^1\text{H}$ NMR ( $\text{CDCl}_3$ , 300 MHz) of <b>10</b>                                                                                                  | S7  |
| $^{13}\text{C}$ NMR ( $\text{CDCl}_3$ , 75 MHz) of <b>10</b>                                                                                                | S8  |
| $^1\text{H}$ NMR ( $\text{CDCl}_3$ , 300 MHz) of <b>11</b>                                                                                                  | S9  |
| $^{13}\text{C}$ NMR ( $\text{CDCl}_3$ , 75 MHz) of <b>11</b>                                                                                                | S10 |
| $^1\text{H}$ NMR ( $\text{CDCl}_3$ , 300 MHz) for hydrogenation of enal <b>9</b><br>(inseparable mixture of <b>11</b> and <b>12</b> , see table 3, entry 3) | S11 |
| $^1\text{H}$ NMR ( $\text{CDCl}_3$ , 300 MHz) of <b>13</b>                                                                                                  | S12 |
| $^{13}\text{C}$ NMR-APT ( $\text{CDCl}_3$ , 75 MHz) of <b>13</b>                                                                                            | S13 |
| $^1\text{H}$ NMR ( $\text{CDCl}_3$ , 300 MHz) of <b>16</b>                                                                                                  | S14 |
| $^{13}\text{C}$ NMR ( $\text{CDCl}_3$ , 75 MHz) of <b>16</b>                                                                                                | S15 |
| $^1\text{H}$ NMR ( $\text{CDCl}_3$ , 300 MHz) of <b>17</b>                                                                                                  | S16 |
| $^{13}\text{C}$ NMR-APT ( $\text{CDCl}_3$ , 75 MHz) of <b>17</b>                                                                                            | S17 |
| $^1\text{H}$ NMR ( $\text{CDCl}_3$ , 300 MHz) of <b>21</b>                                                                                                  | S18 |
| $^{13}\text{C}$ NMR-APT ( $\text{CDCl}_3$ , 75 MHz) of <b>21</b>                                                                                            | S19 |
| $^1\text{H}$ NMR ( $\text{CDCl}_3$ , 300 MHz) of <b>22</b>                                                                                                  | S20 |
| $^{13}\text{C}$ NMR-APT ( $\text{CDCl}_3$ , 75 MHz) of <b>22</b>                                                                                            | S21 |
| $^1\text{H}$ NMR ( $\text{CDCl}_3$ , 300 MHz) of <b>23</b>                                                                                                  | S22 |
| $^{13}\text{C}$ NMR-APT ( $\text{CDCl}_3$ , 75 MHz) of <b>23</b>                                                                                            | S23 |
| $^1\text{H}$ NMR ( $\text{CDCl}_3$ , 300 MHz) of <b>24</b>                                                                                                  | S24 |
| $^{13}\text{C}$ NMR ( $\text{CDCl}_3$ , 75 MHz) of <b>24</b>                                                                                                | S25 |
| $^1\text{H}$ NMR ( $\text{CDCl}_3$ , 300 MHz) for the mixture obtained from<br>deprotection of <b>24</b>                                                    | S26 |



$^{13}\text{C}$  NMR ( $\text{CDCl}_3$ , 125 MHz) of **8**

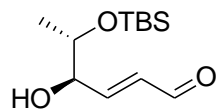

— 193.3

— 154.4

— 132.3

— 75.0

— 70.7

— 25.7

— 20.1

— 18.1

— 4.4

— 4.9

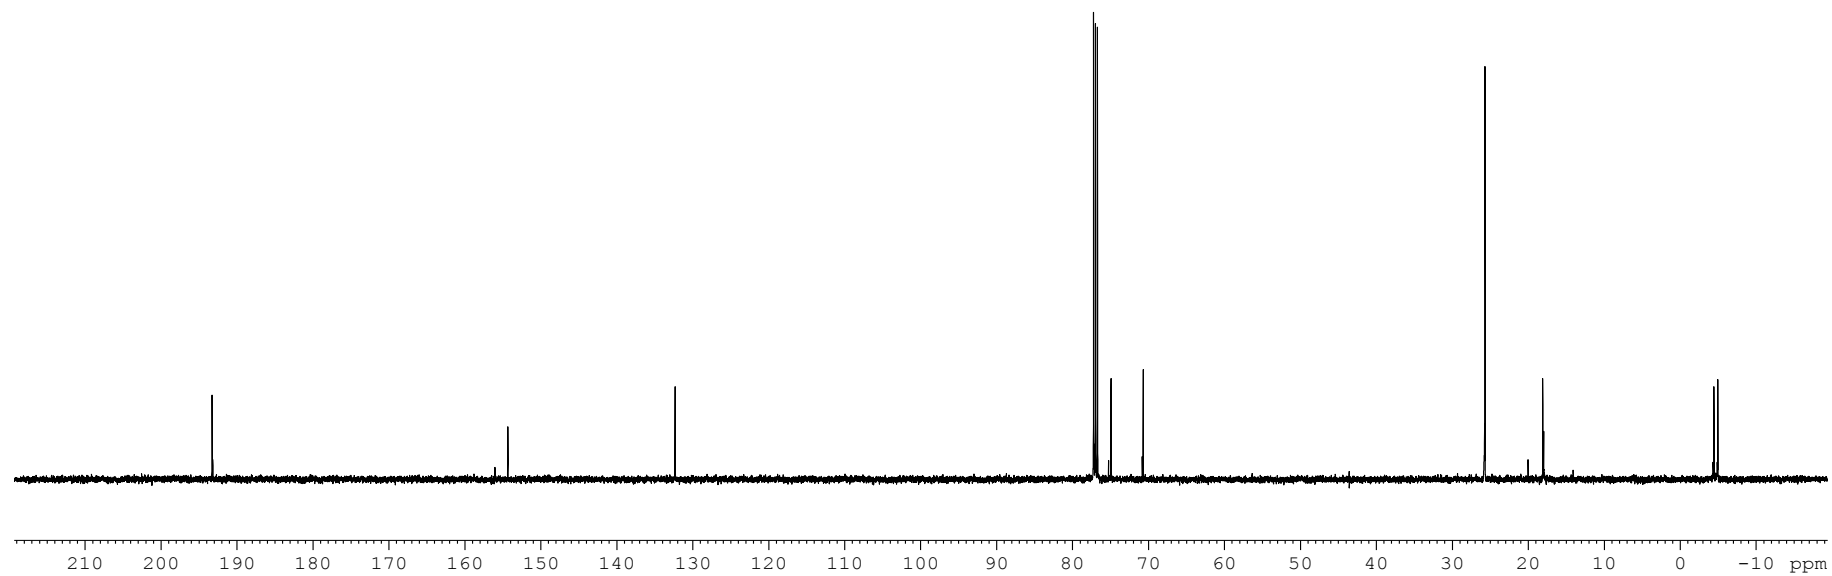

<sup>1</sup>H NMR (CDCl<sub>3</sub>, 300 MHz) of **9**

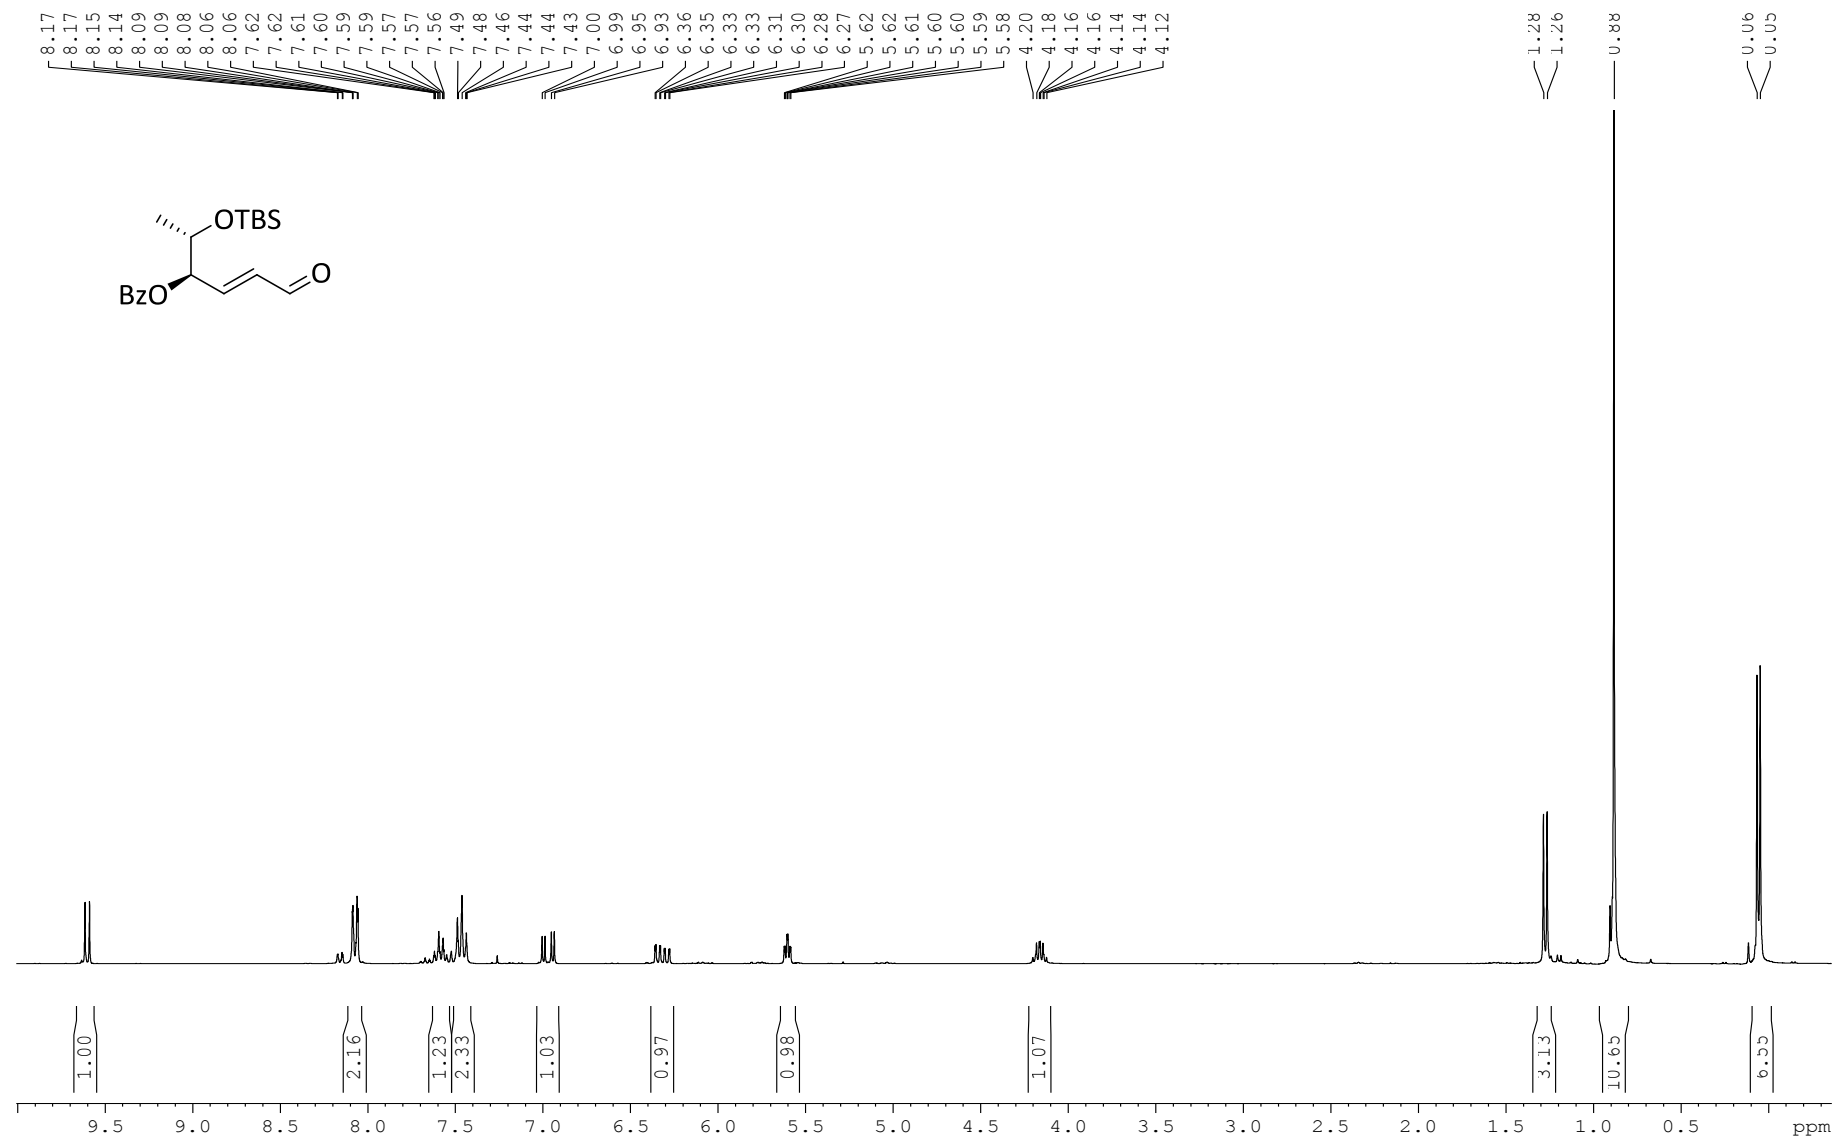

$^{13}\text{C}$  NMR ( $\text{CDCl}_3$ , 75 MHz) of **9**

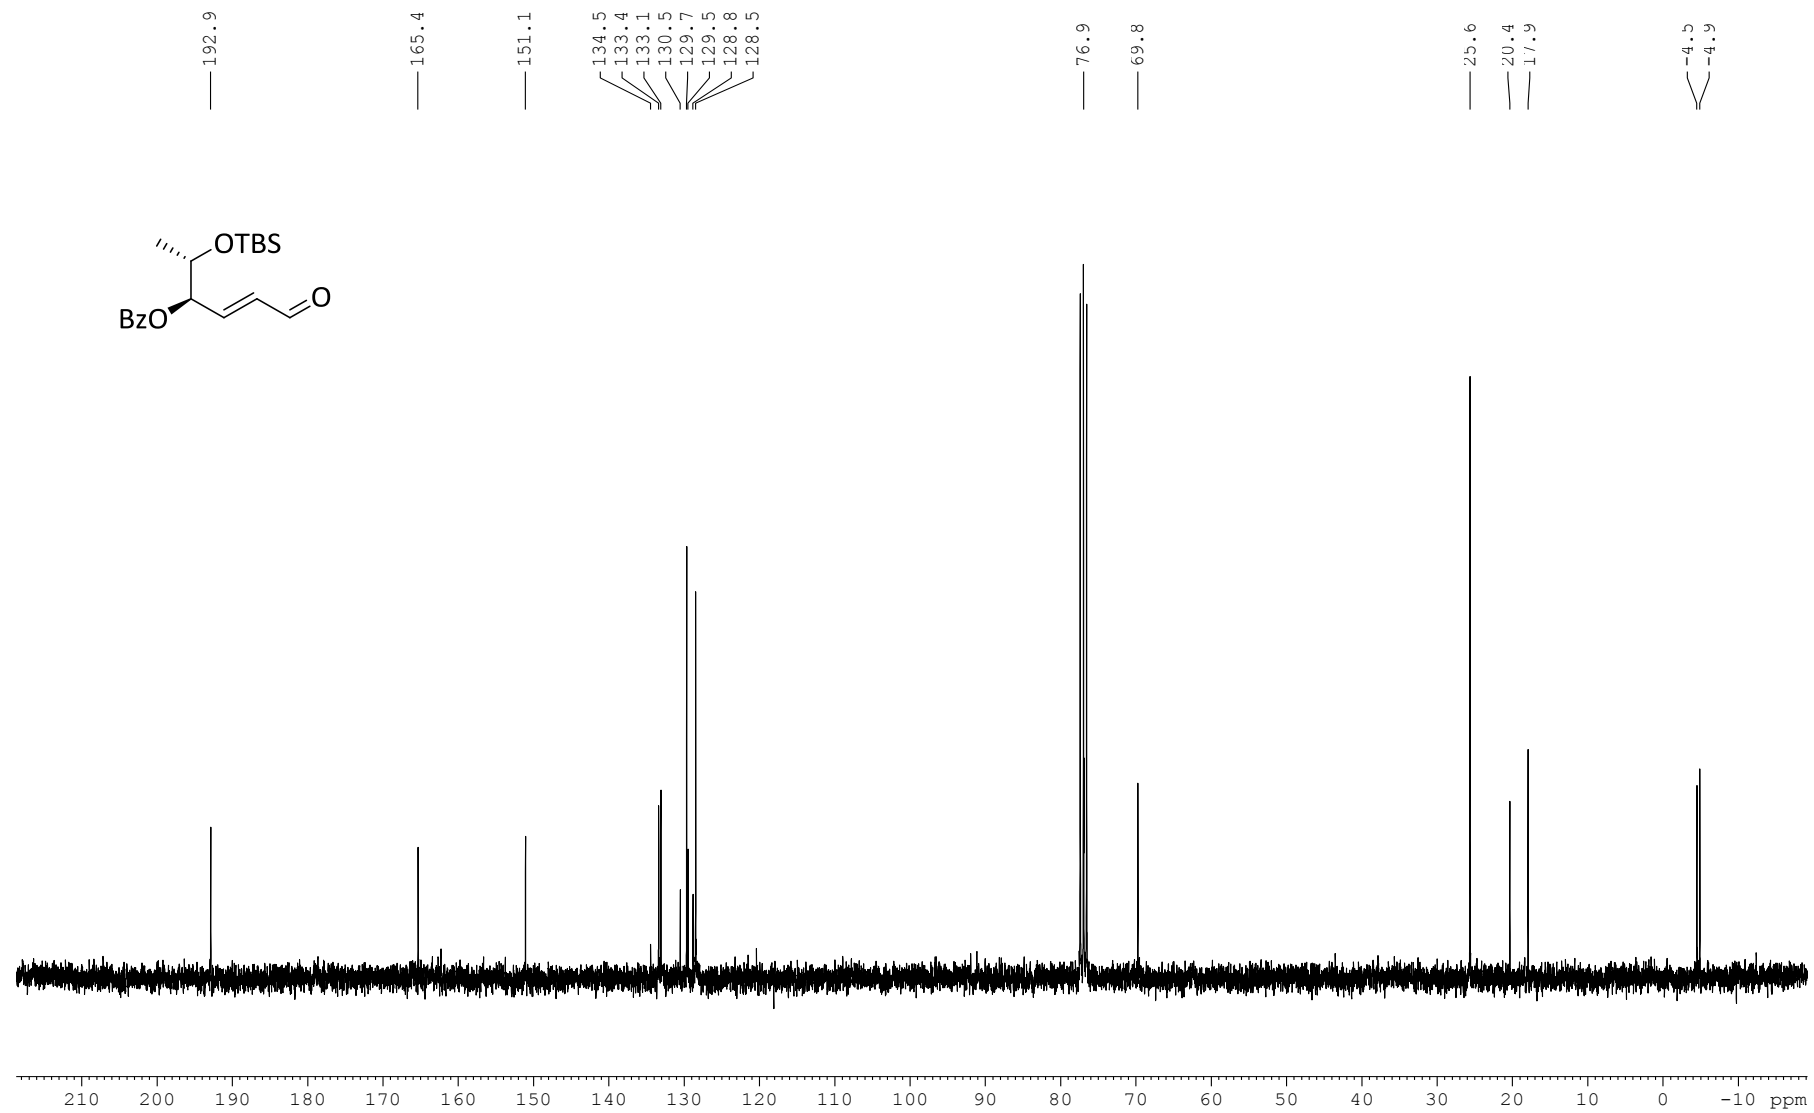

$^1\text{H}$  NMR ( $\text{CDCl}_3$ , 300 MHz) of **10**

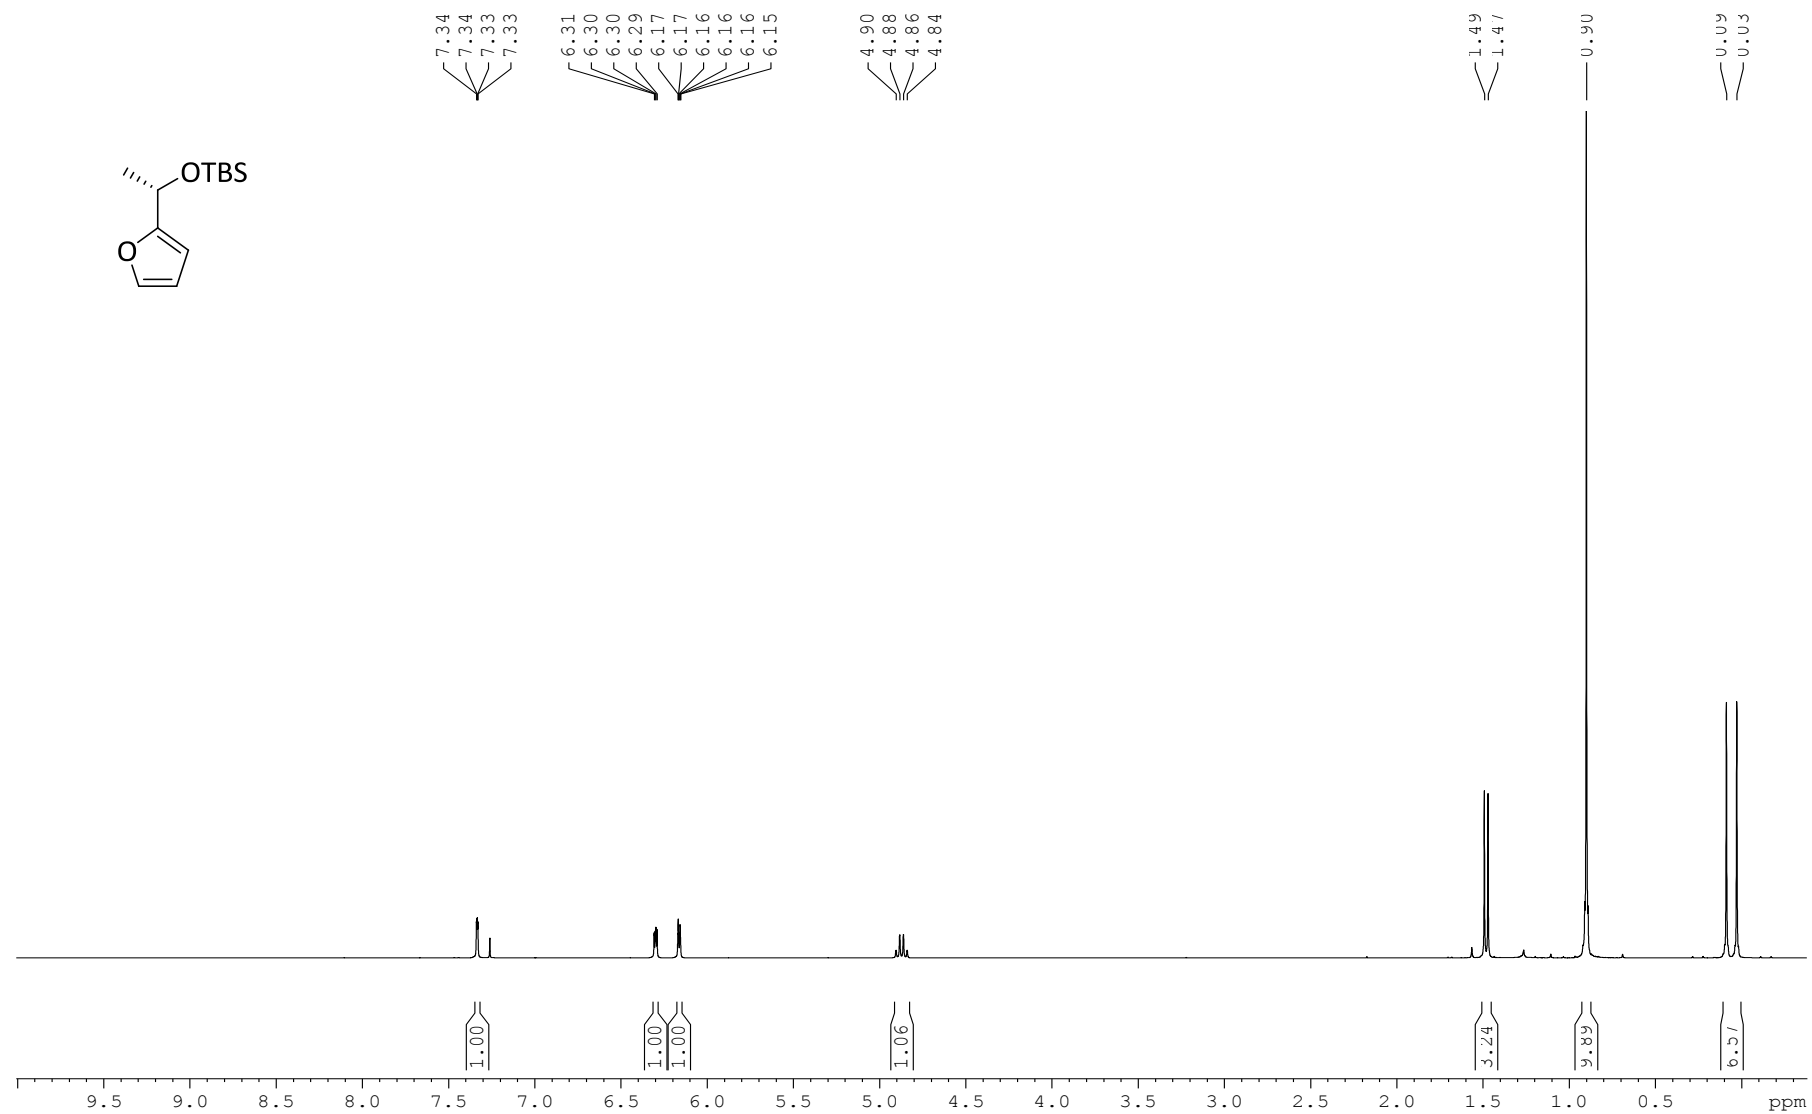

$^{13}\text{C}$  NMR ( $\text{CDCl}_3$ , 75 MHz) of **10**

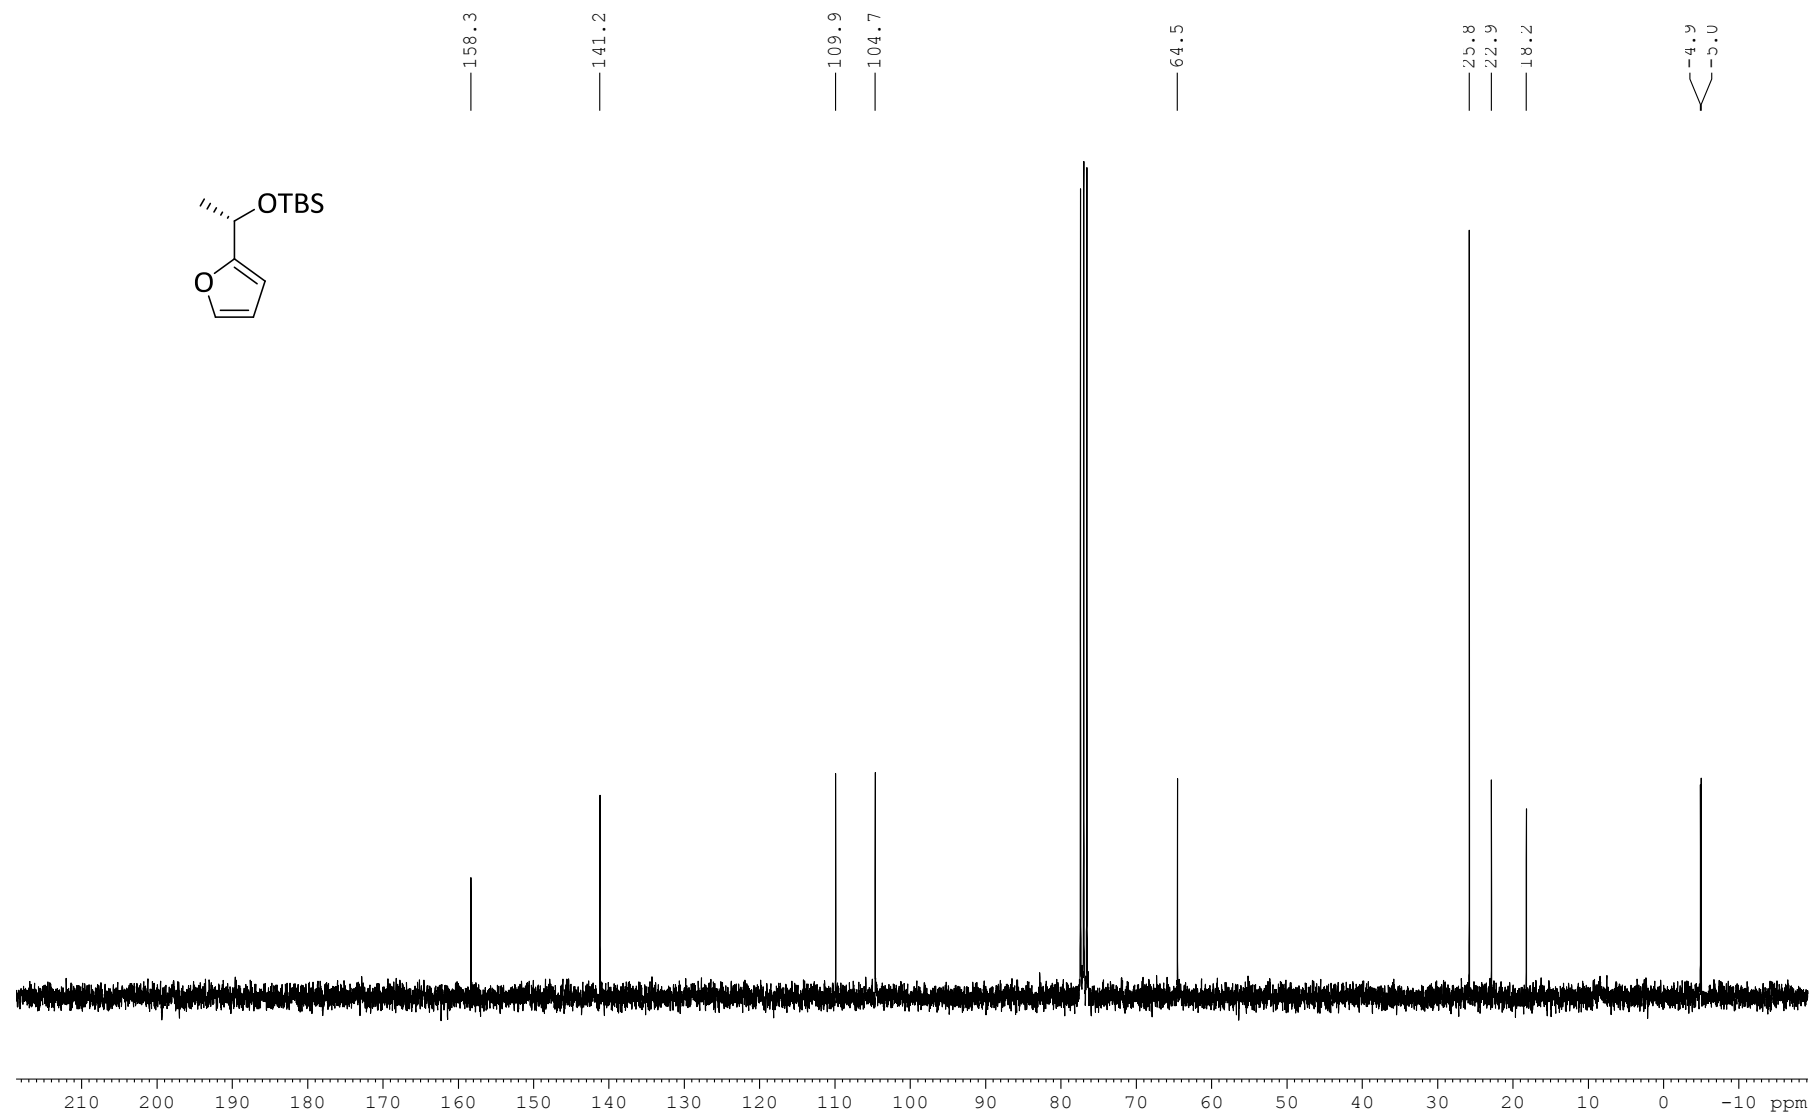



$^1\text{H}$  NMR ( $\text{CDCl}_3$ , 300 MHz) of **11**

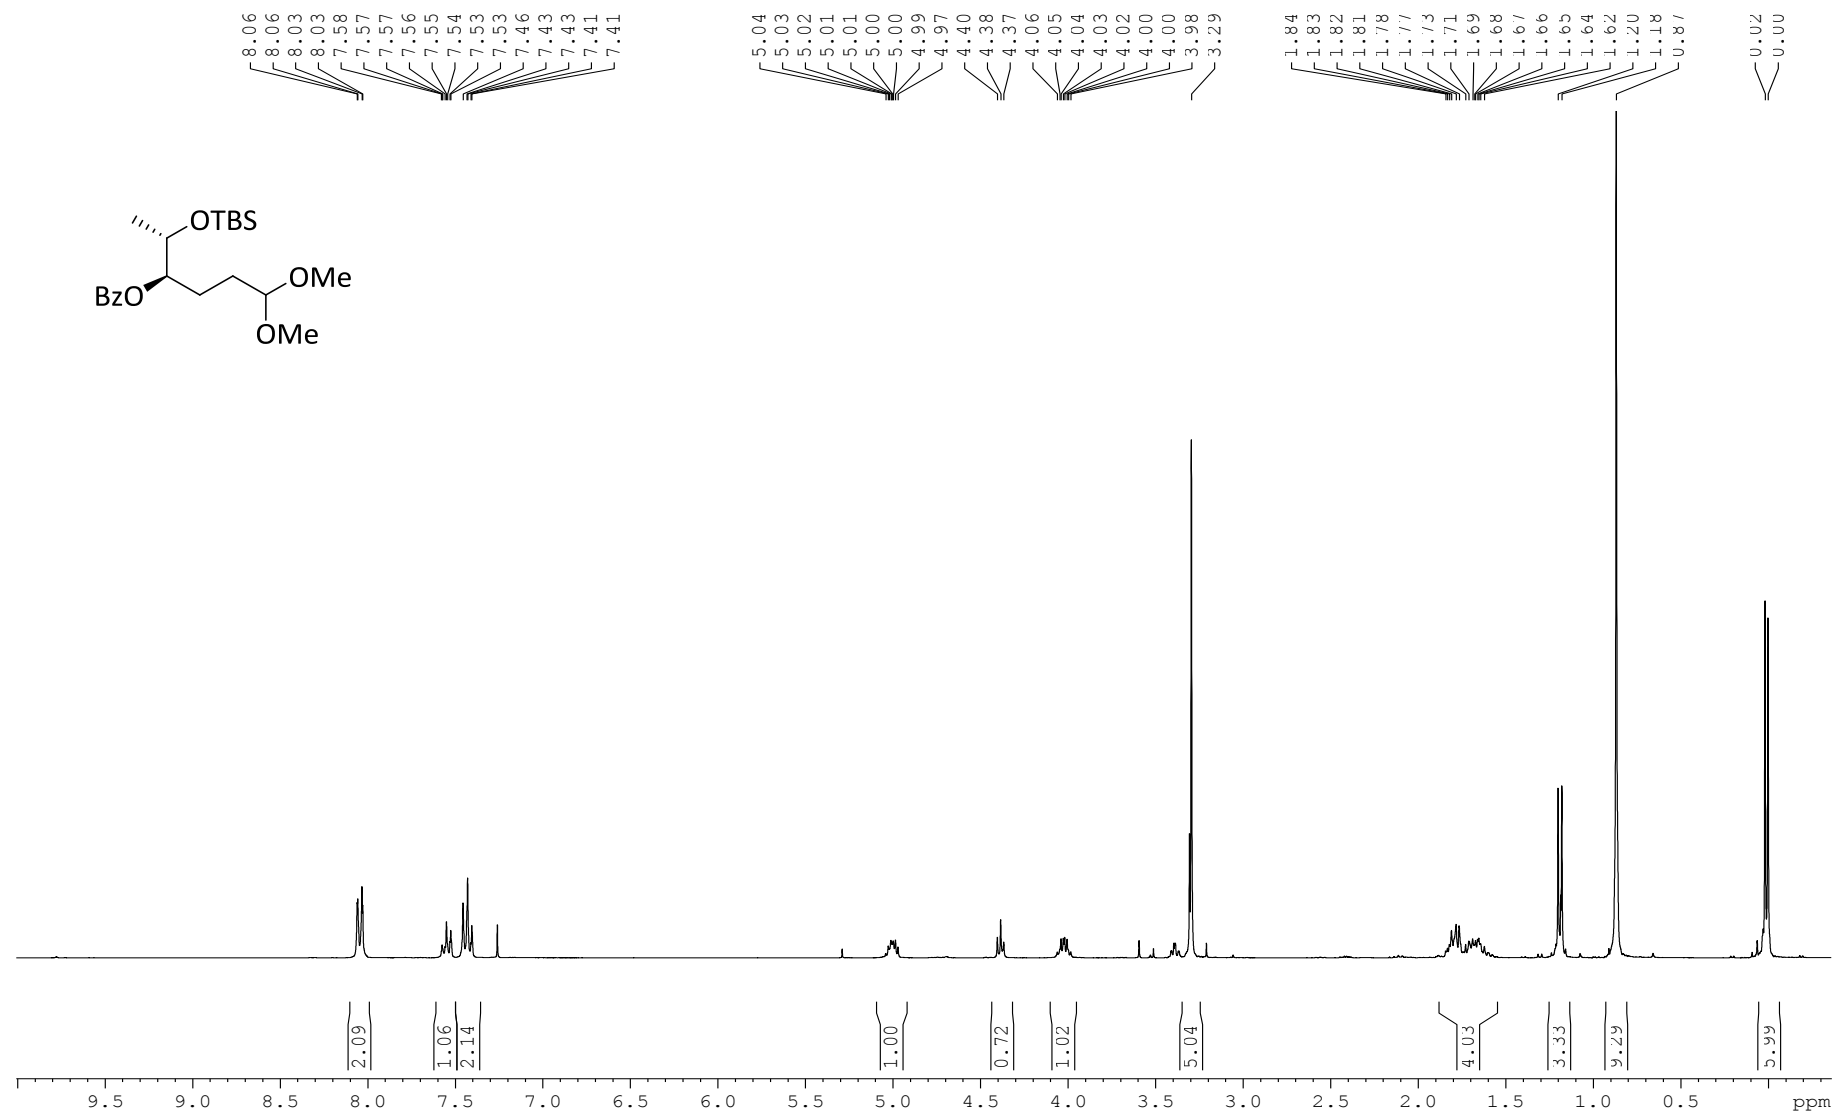

$^{13}\text{C}$  NMR ( $\text{CDCl}_3$ , 75 MHz) of **11**

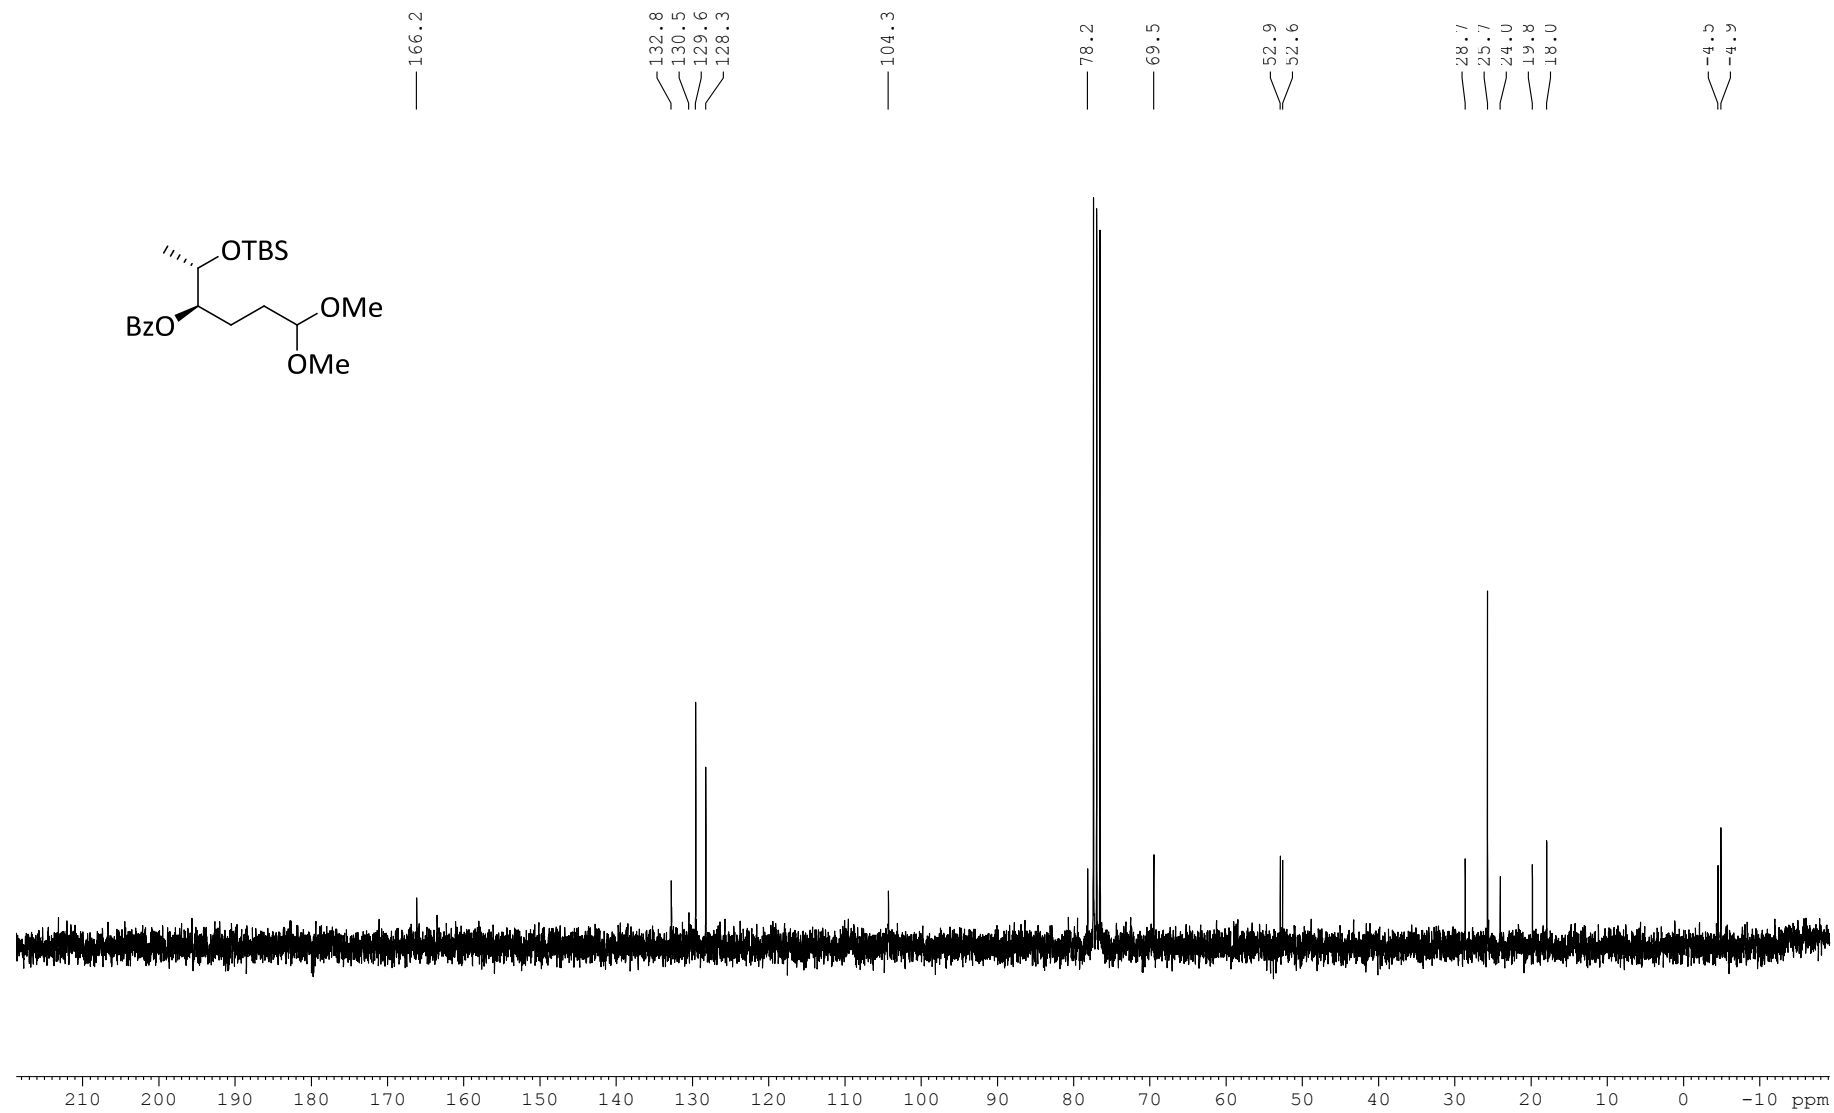



<sup>1</sup>H NMR (CDCl<sub>3</sub>, 300 MHz) of **13**

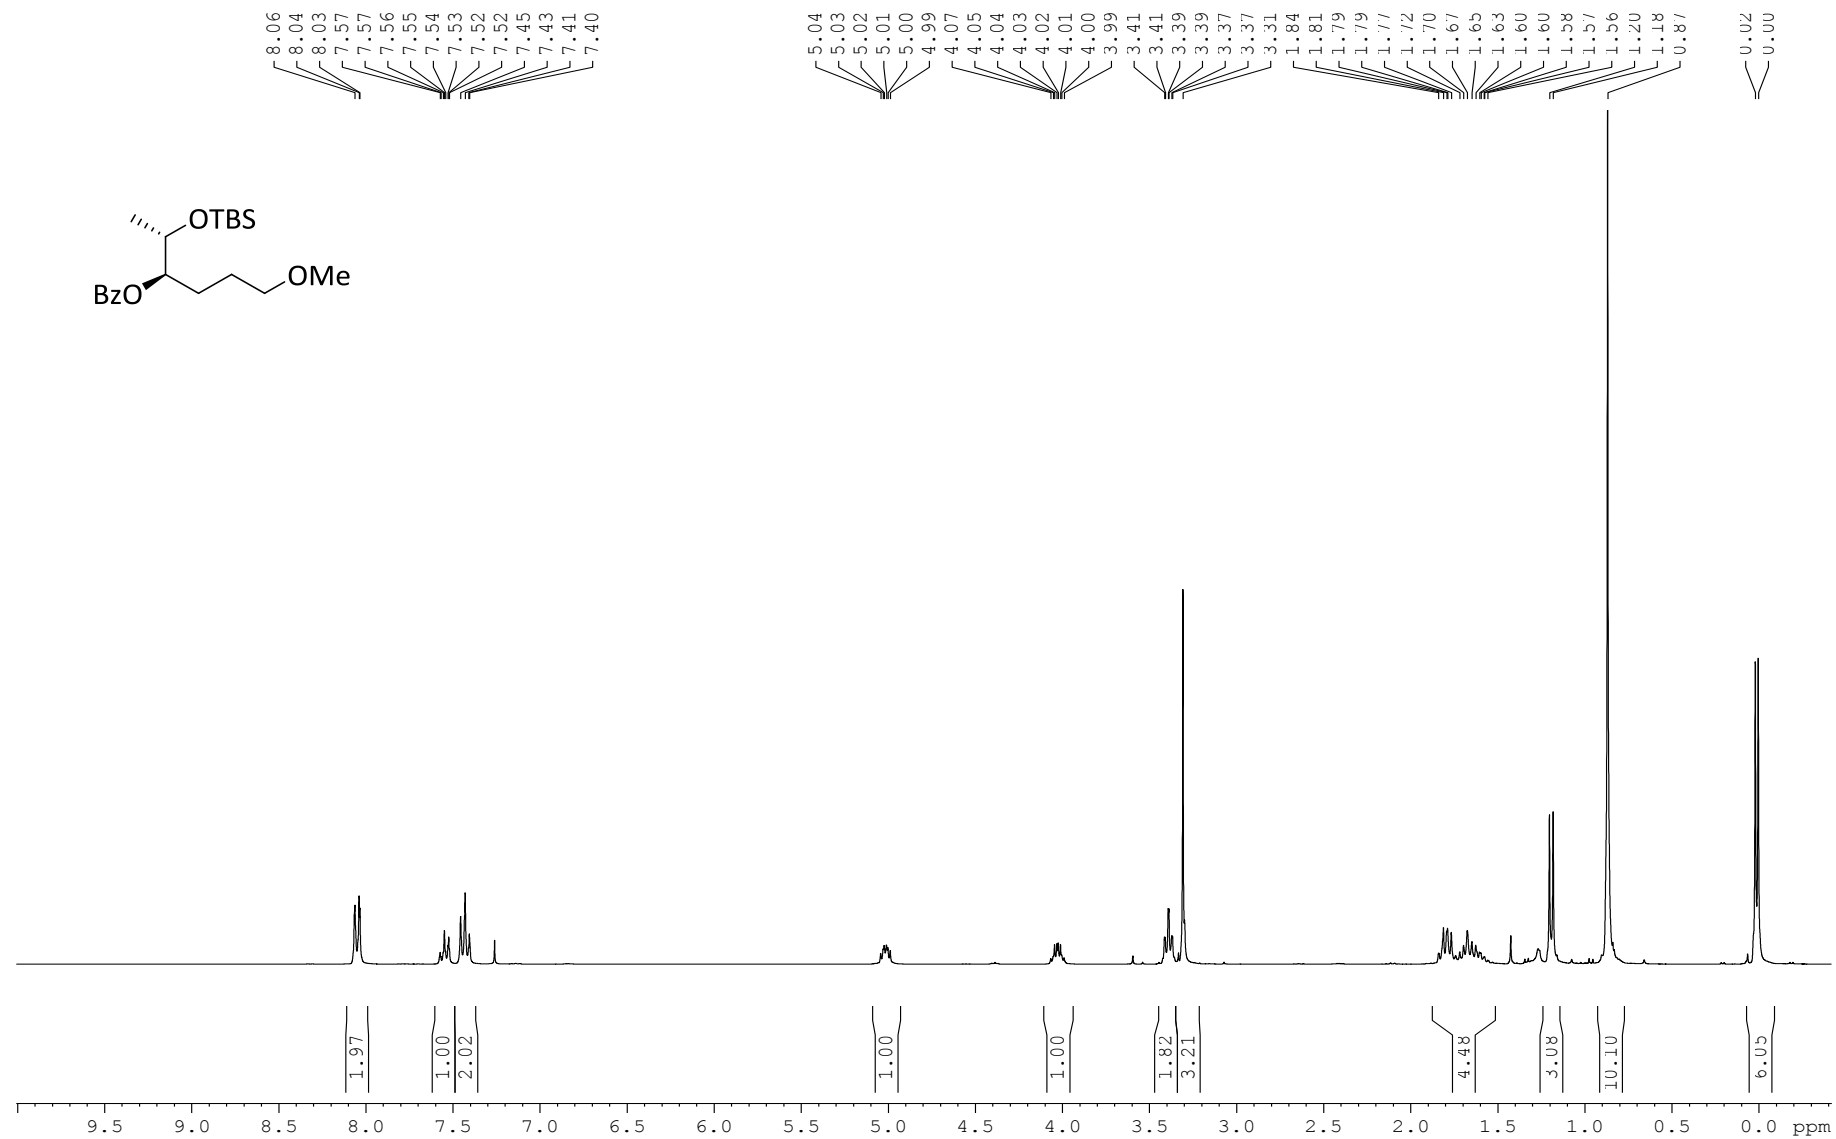

$^{13}\text{C}$  NMR-APT ( $\text{CDCl}_3$ , 75 MHz) of **13**

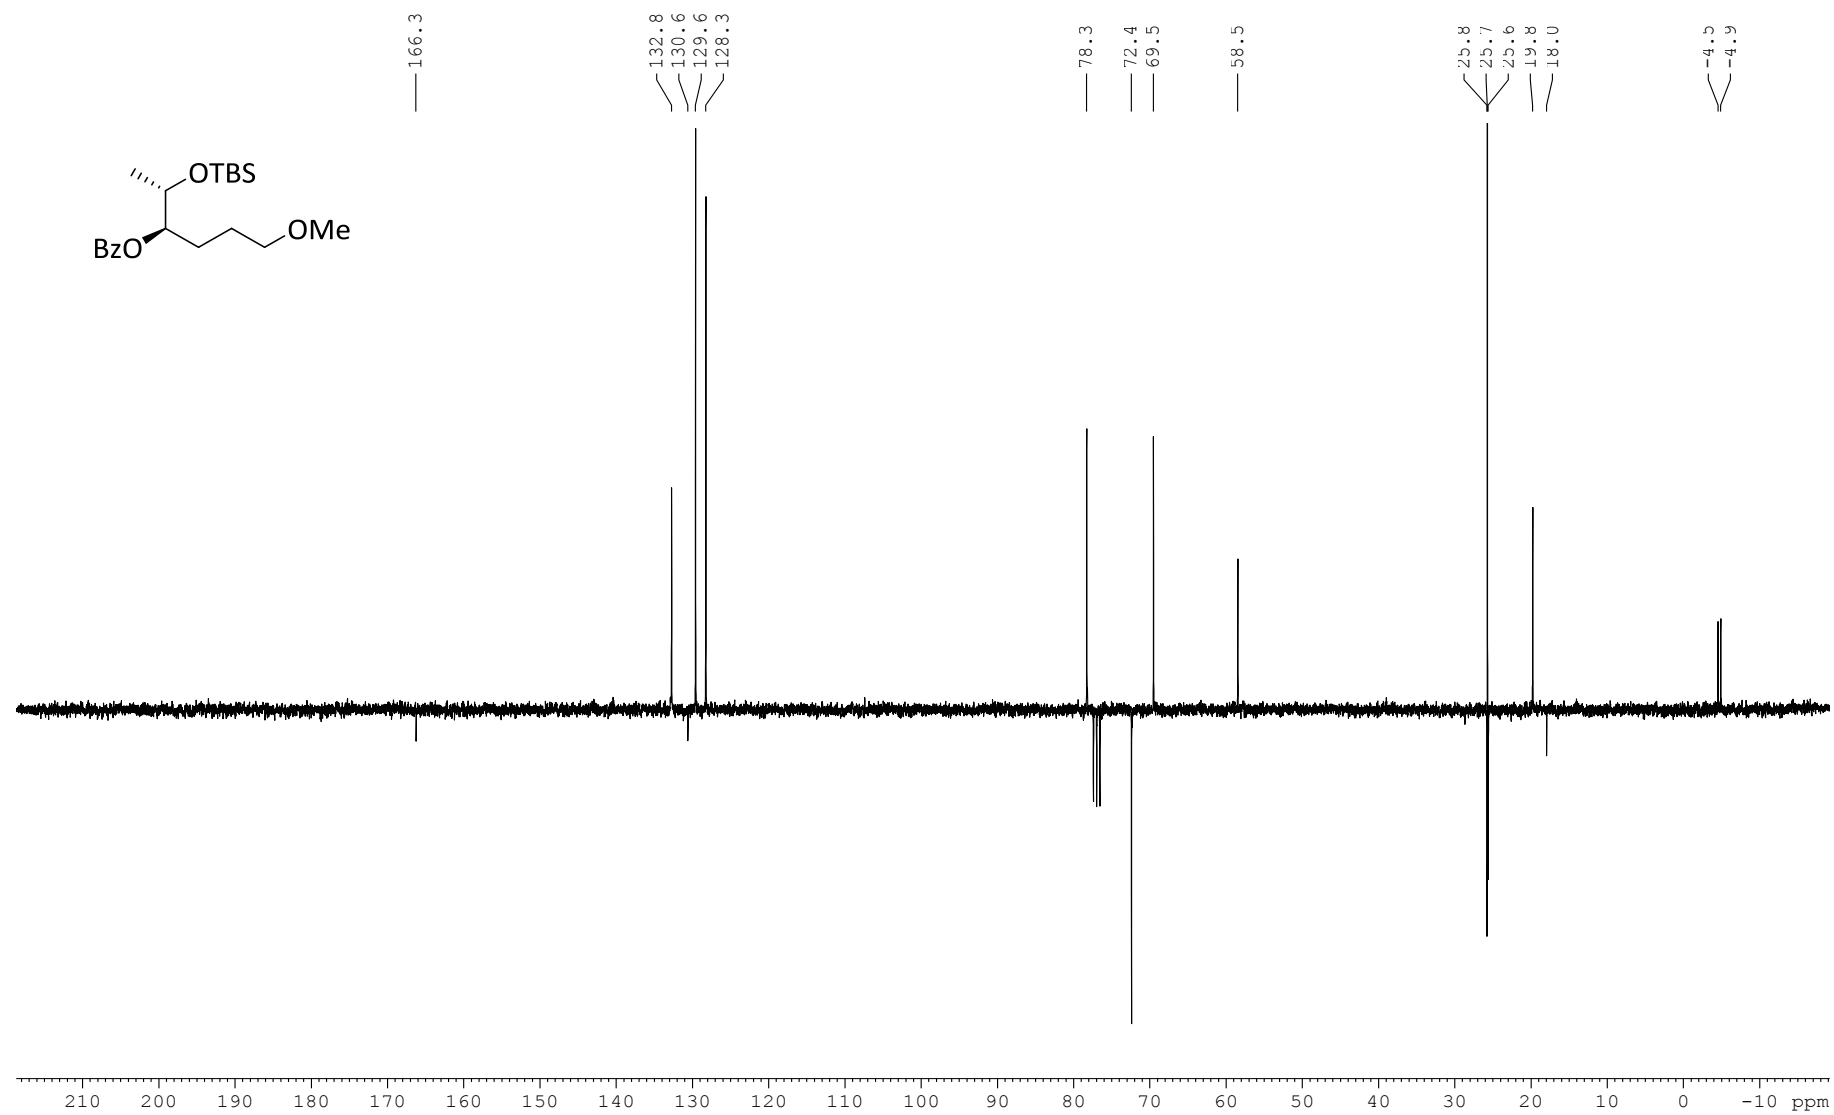

<sup>1</sup>H NMR (CDCl<sub>3</sub>, 300 MHz) of **16**

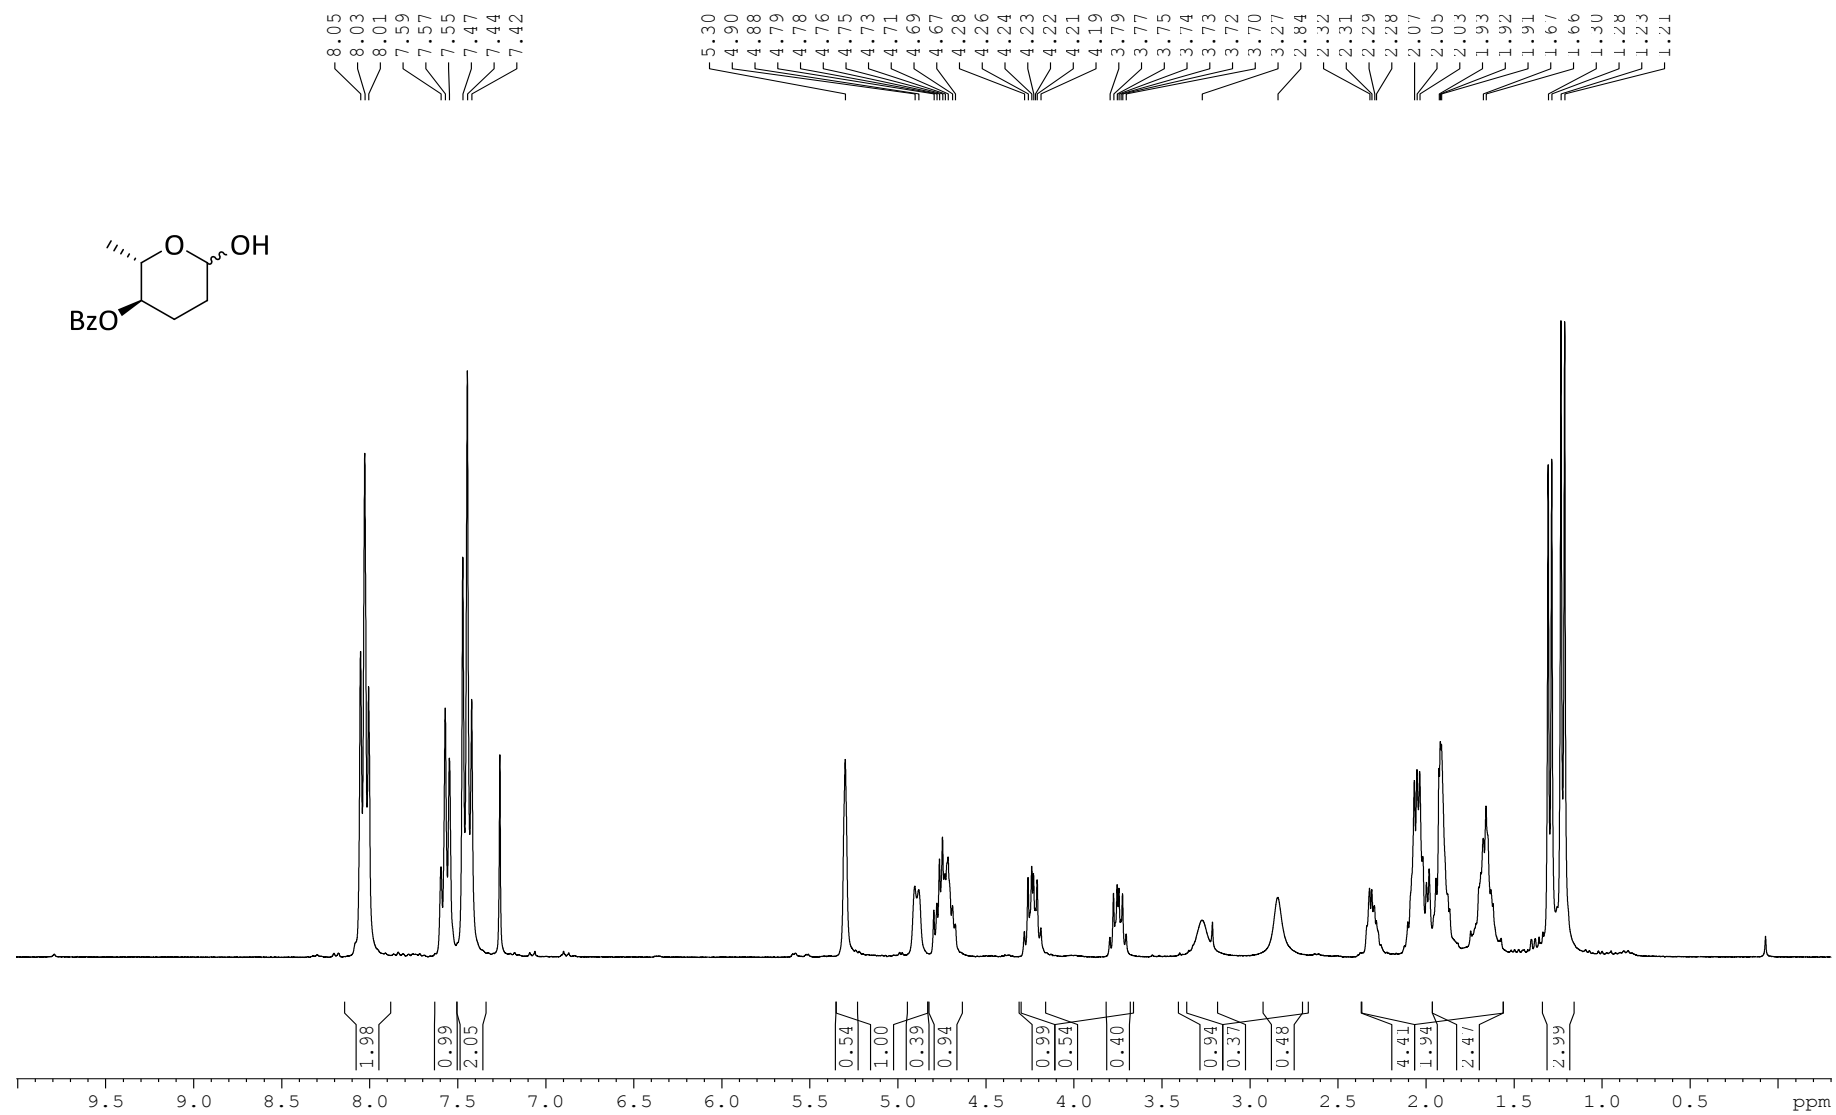

$^{13}\text{C}$  NMR ( $\text{CDCl}_3$ , 75 MHz) of **16**

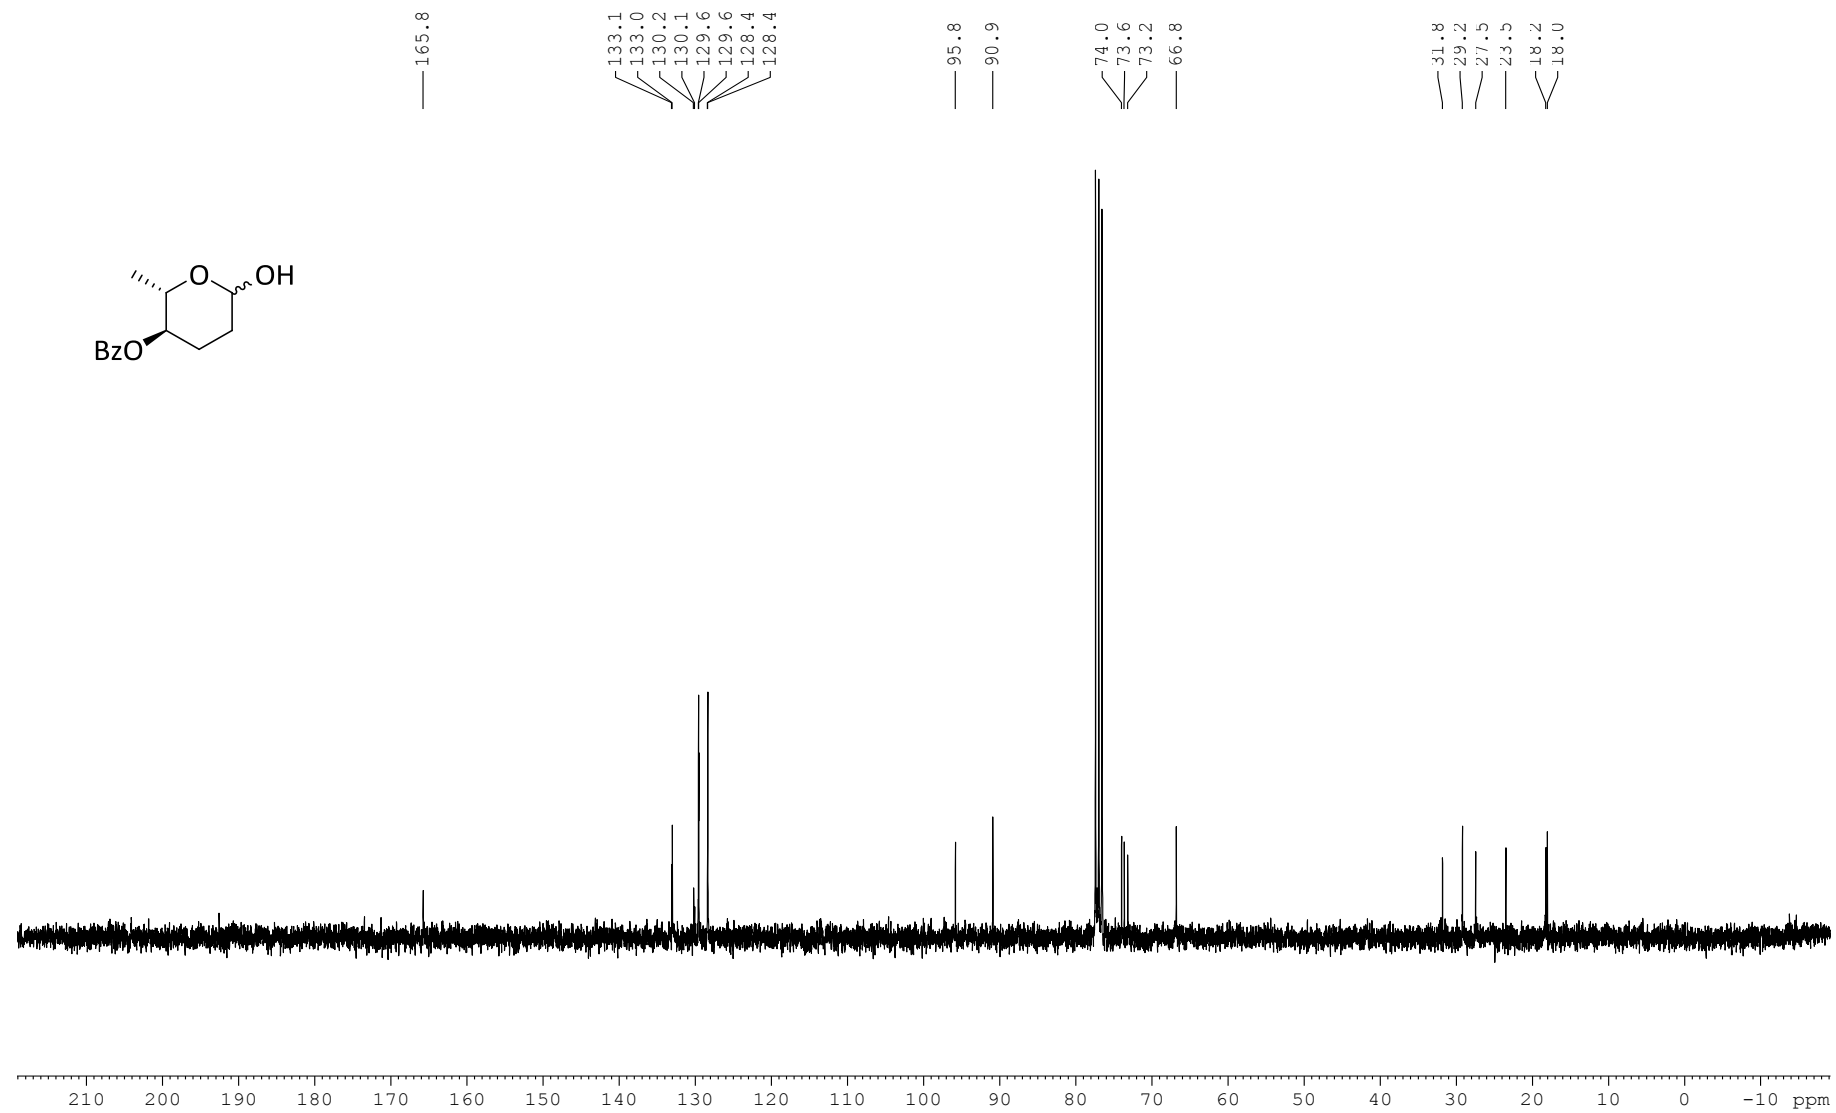

$^1\text{H}$  NMR ( $\text{CDCl}_3$ , 300 MHz) of **17**

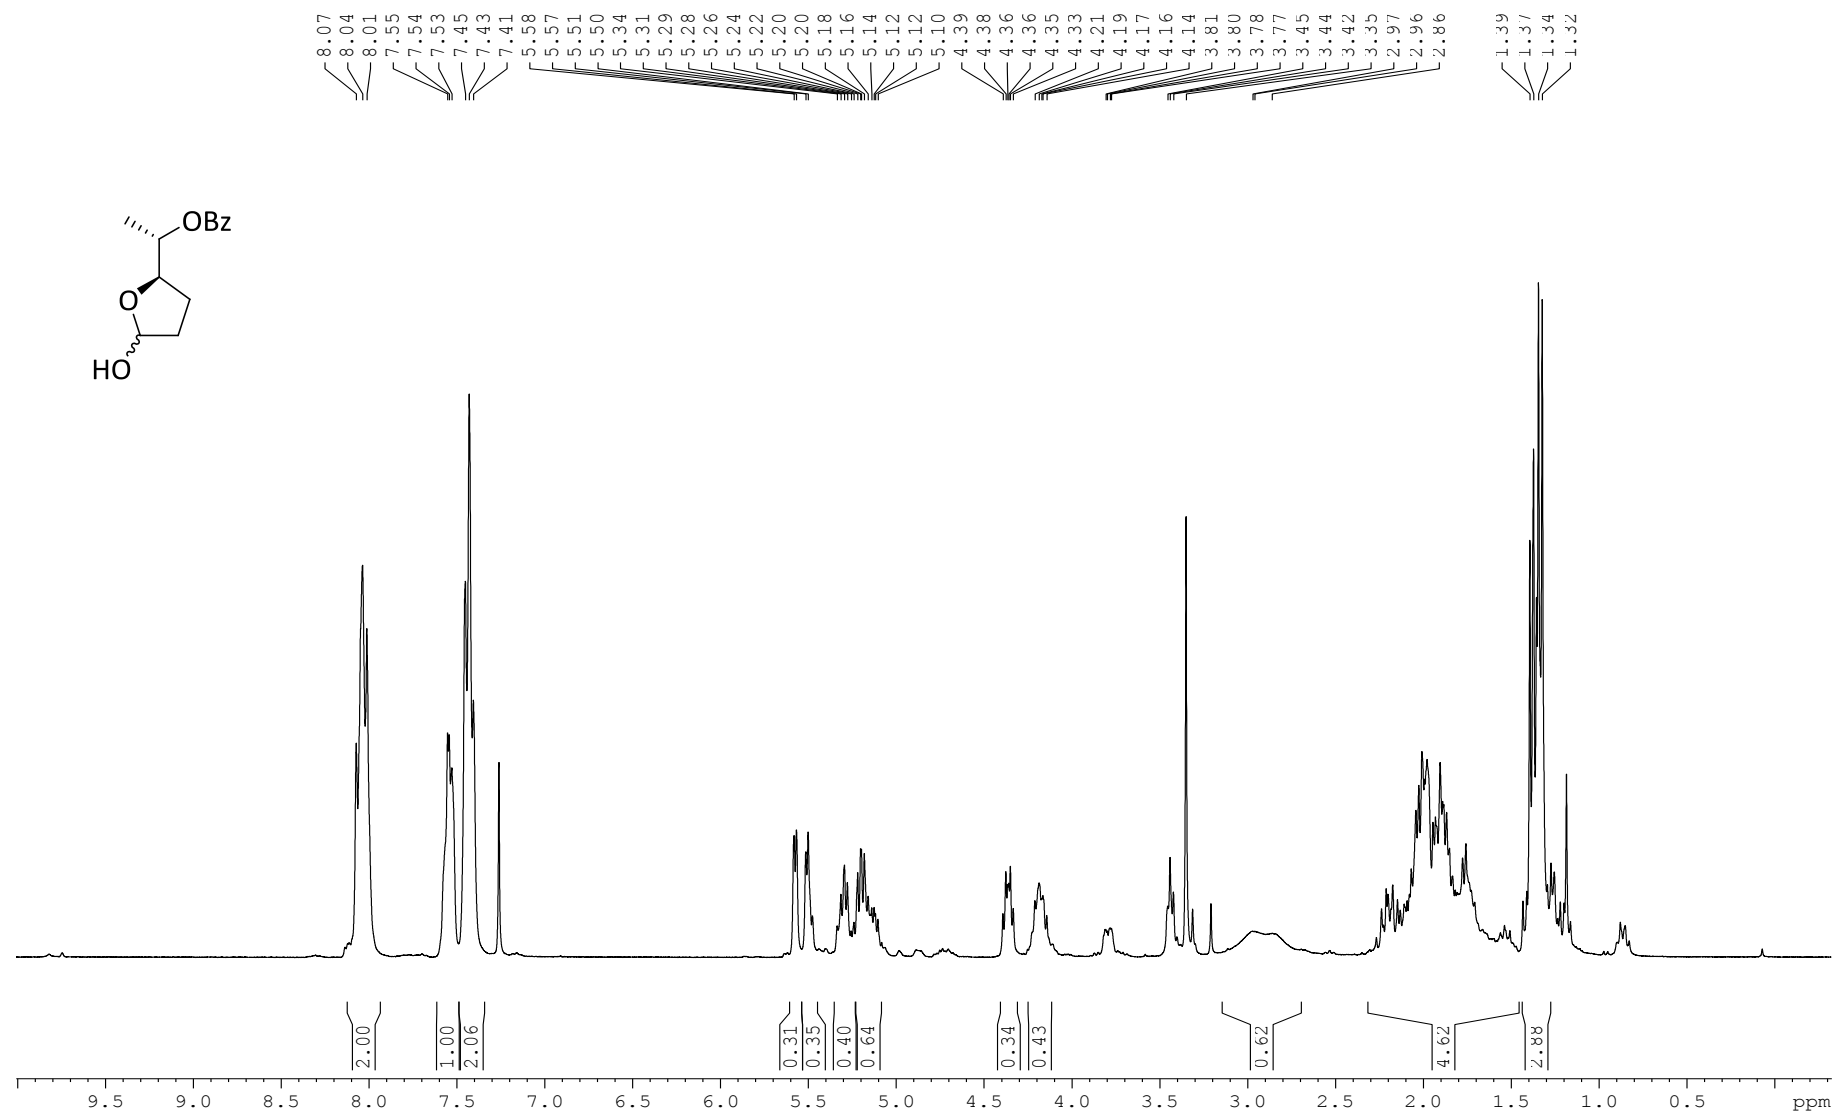



$^{13}\text{C}$  NMR-APT ( $\text{CDCl}_3$ , 75 MHz) of **17**

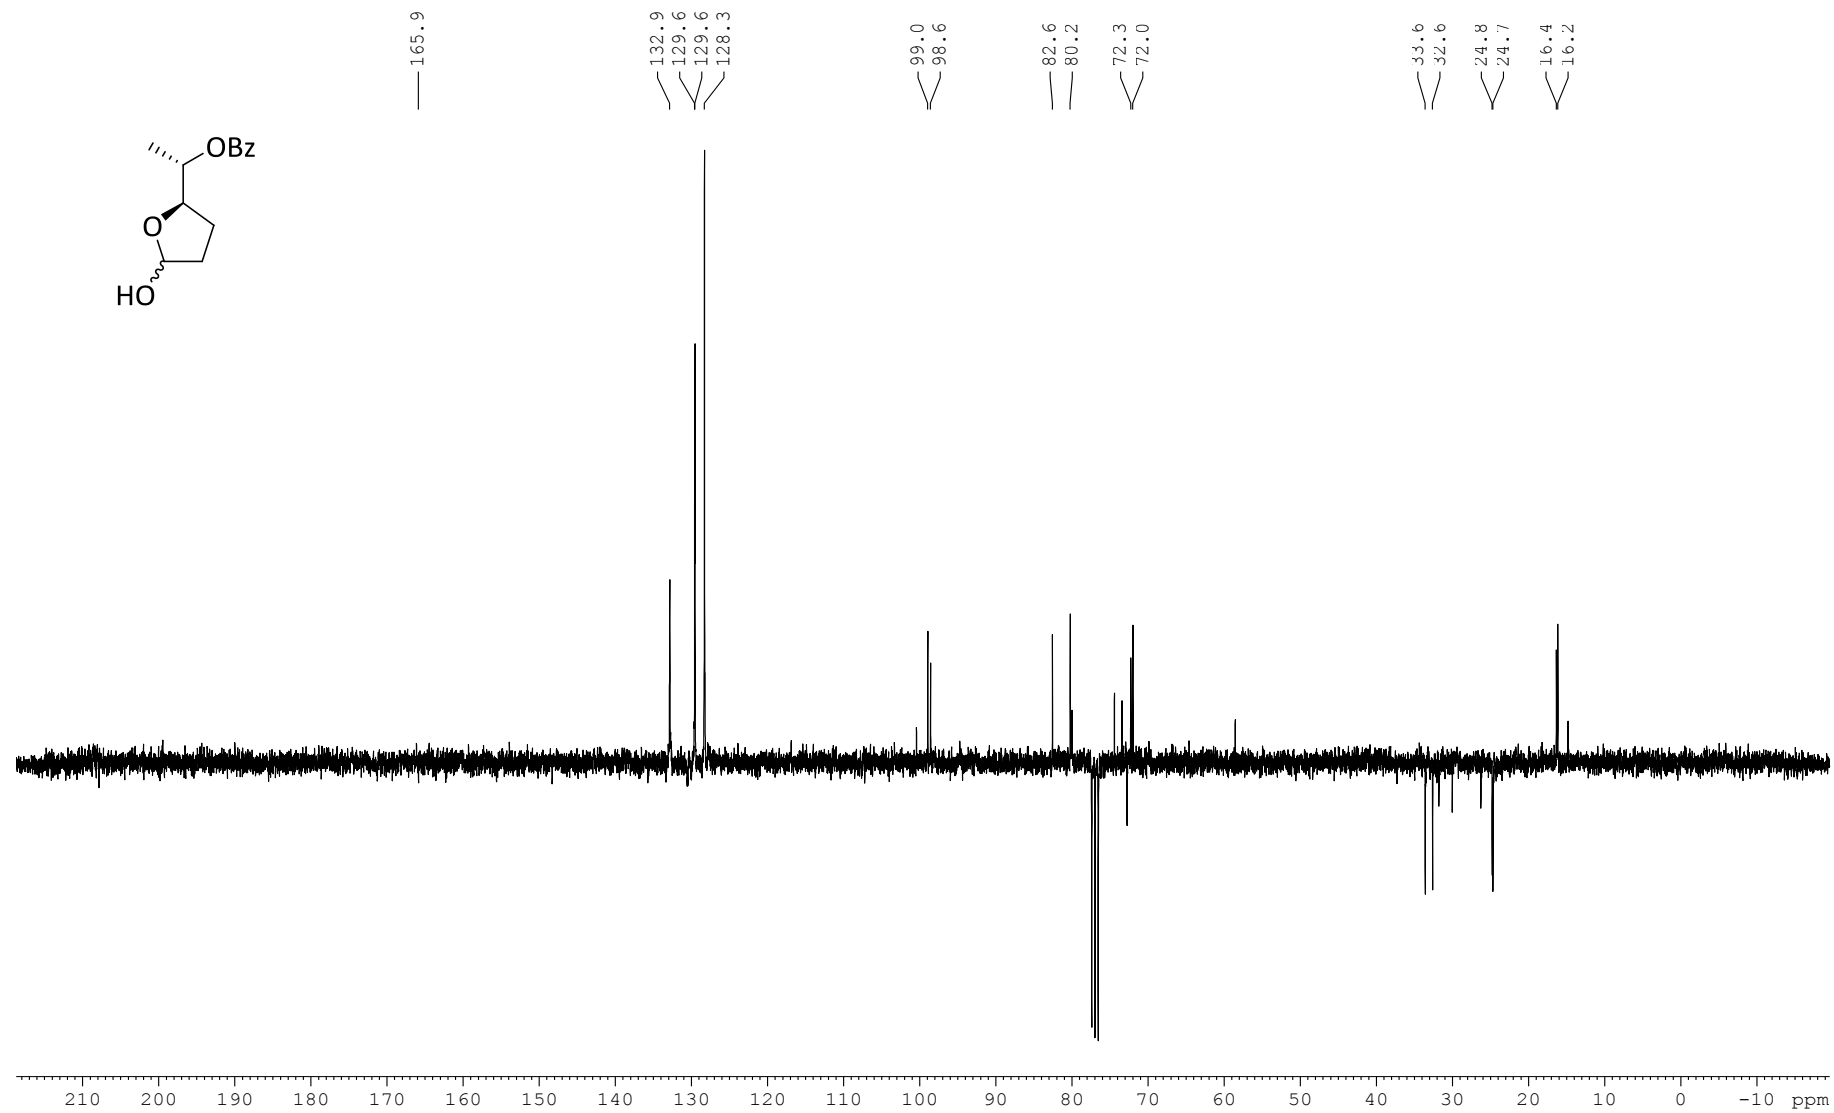

$^1\text{H}$  NMR ( $\text{CDCl}_3$ , 300 MHz) of **21**

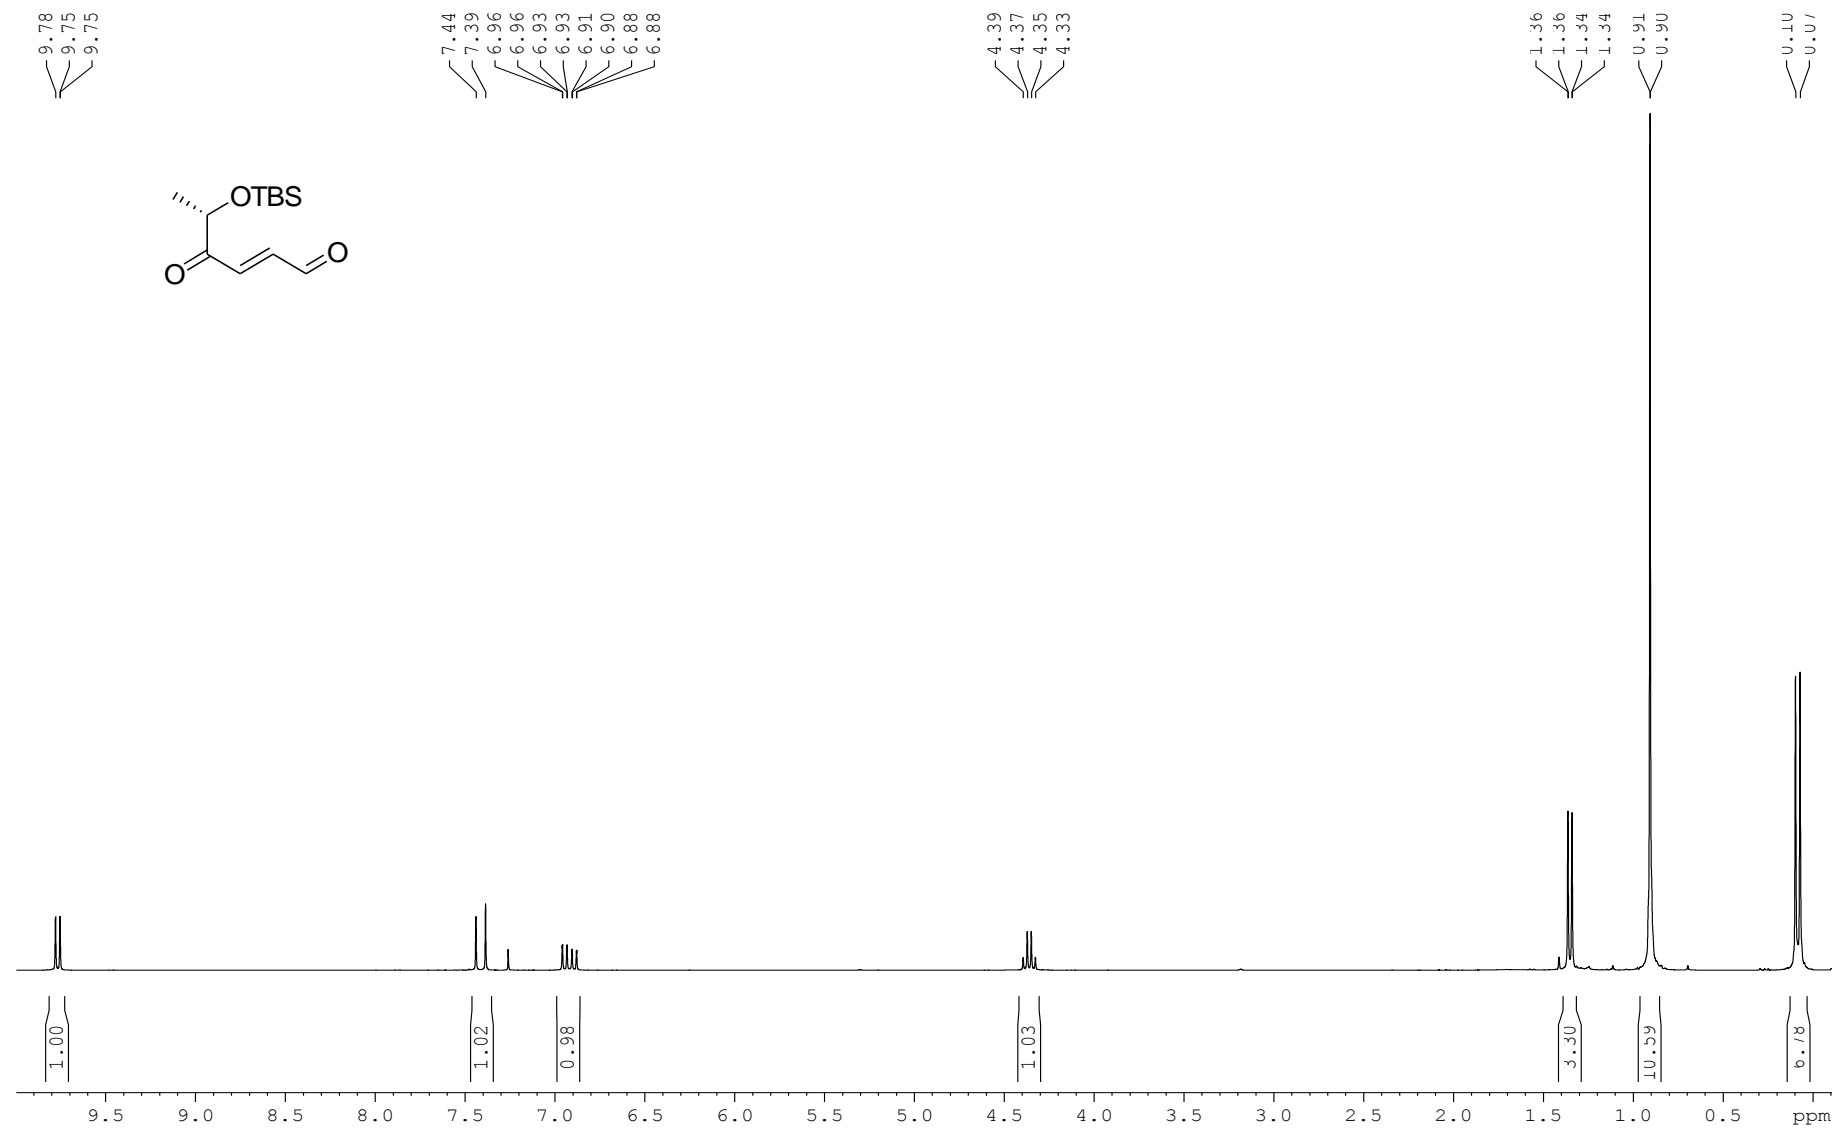

$^{13}\text{C}$  NMR-APT ( $\text{CDCl}_3$ , 75 MHz) of **21**

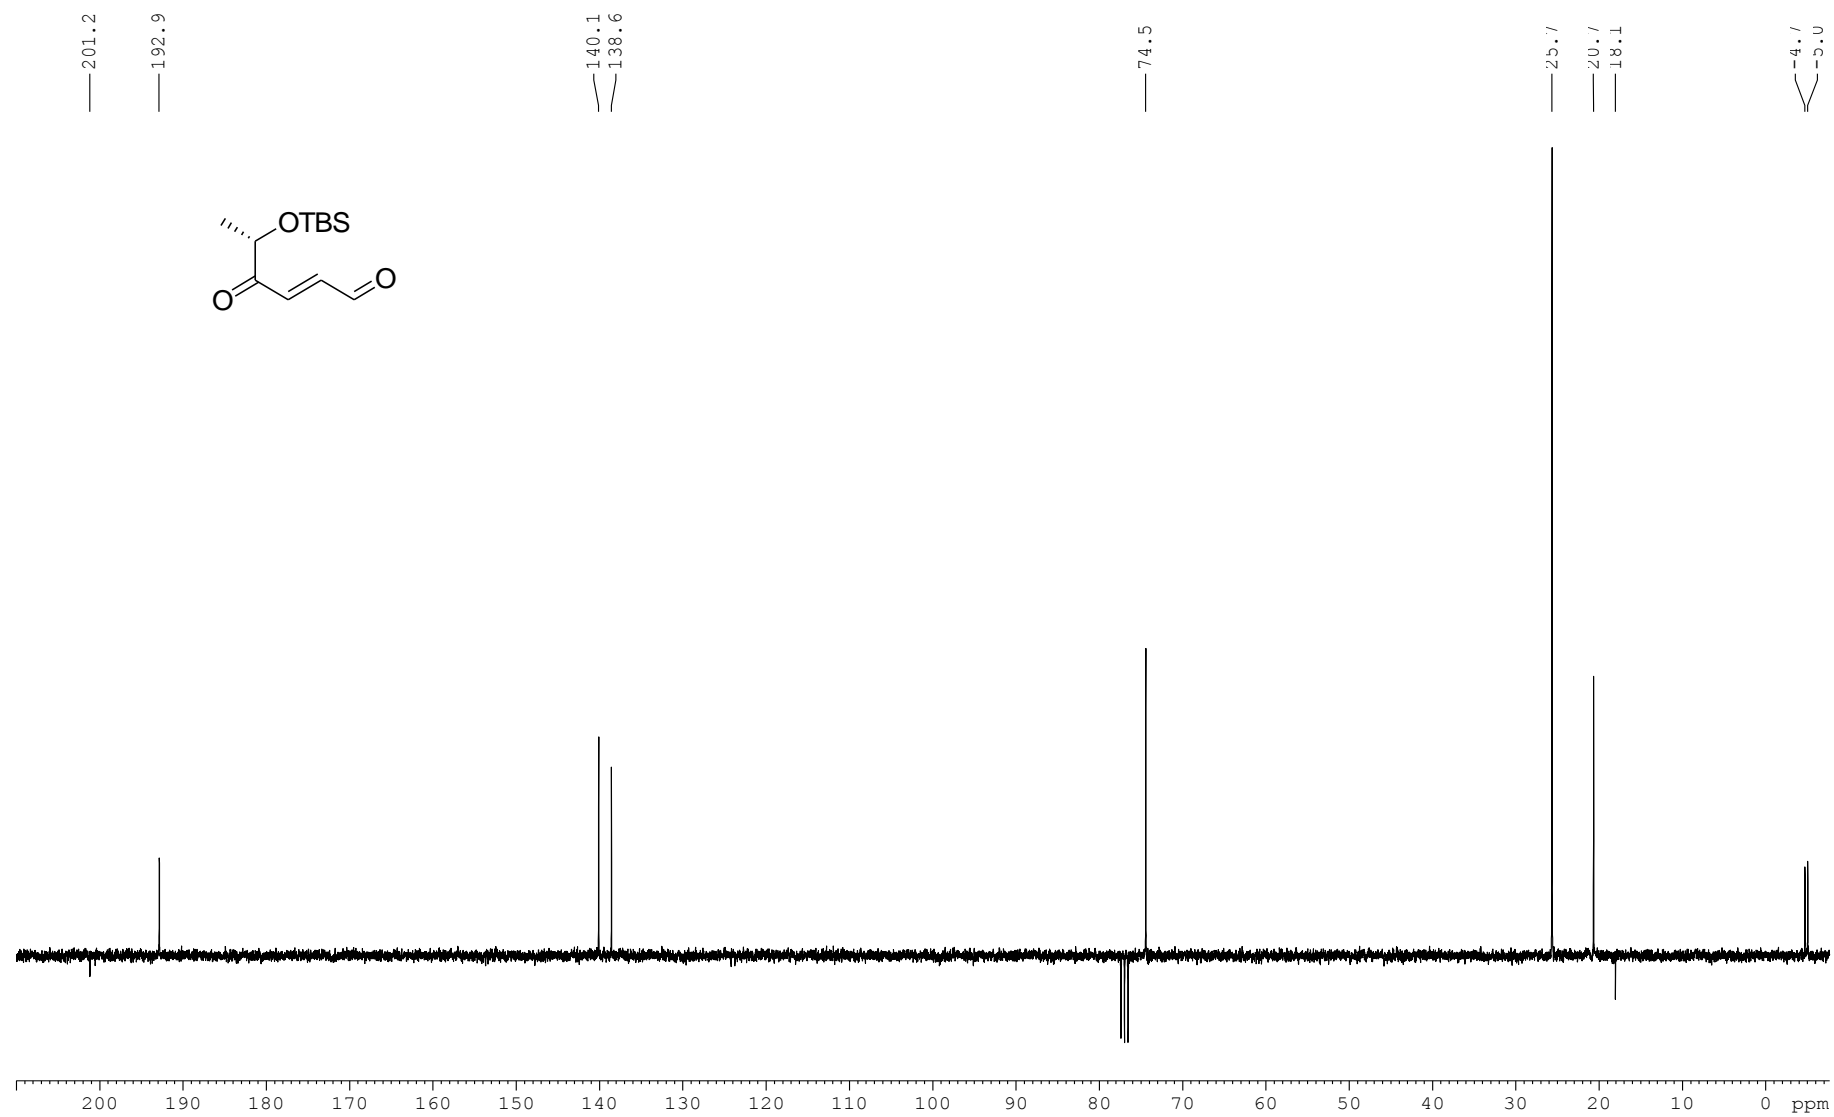

$^1\text{H}$  NMR ( $\text{CDCl}_3$ , 300 MHz) of **22**

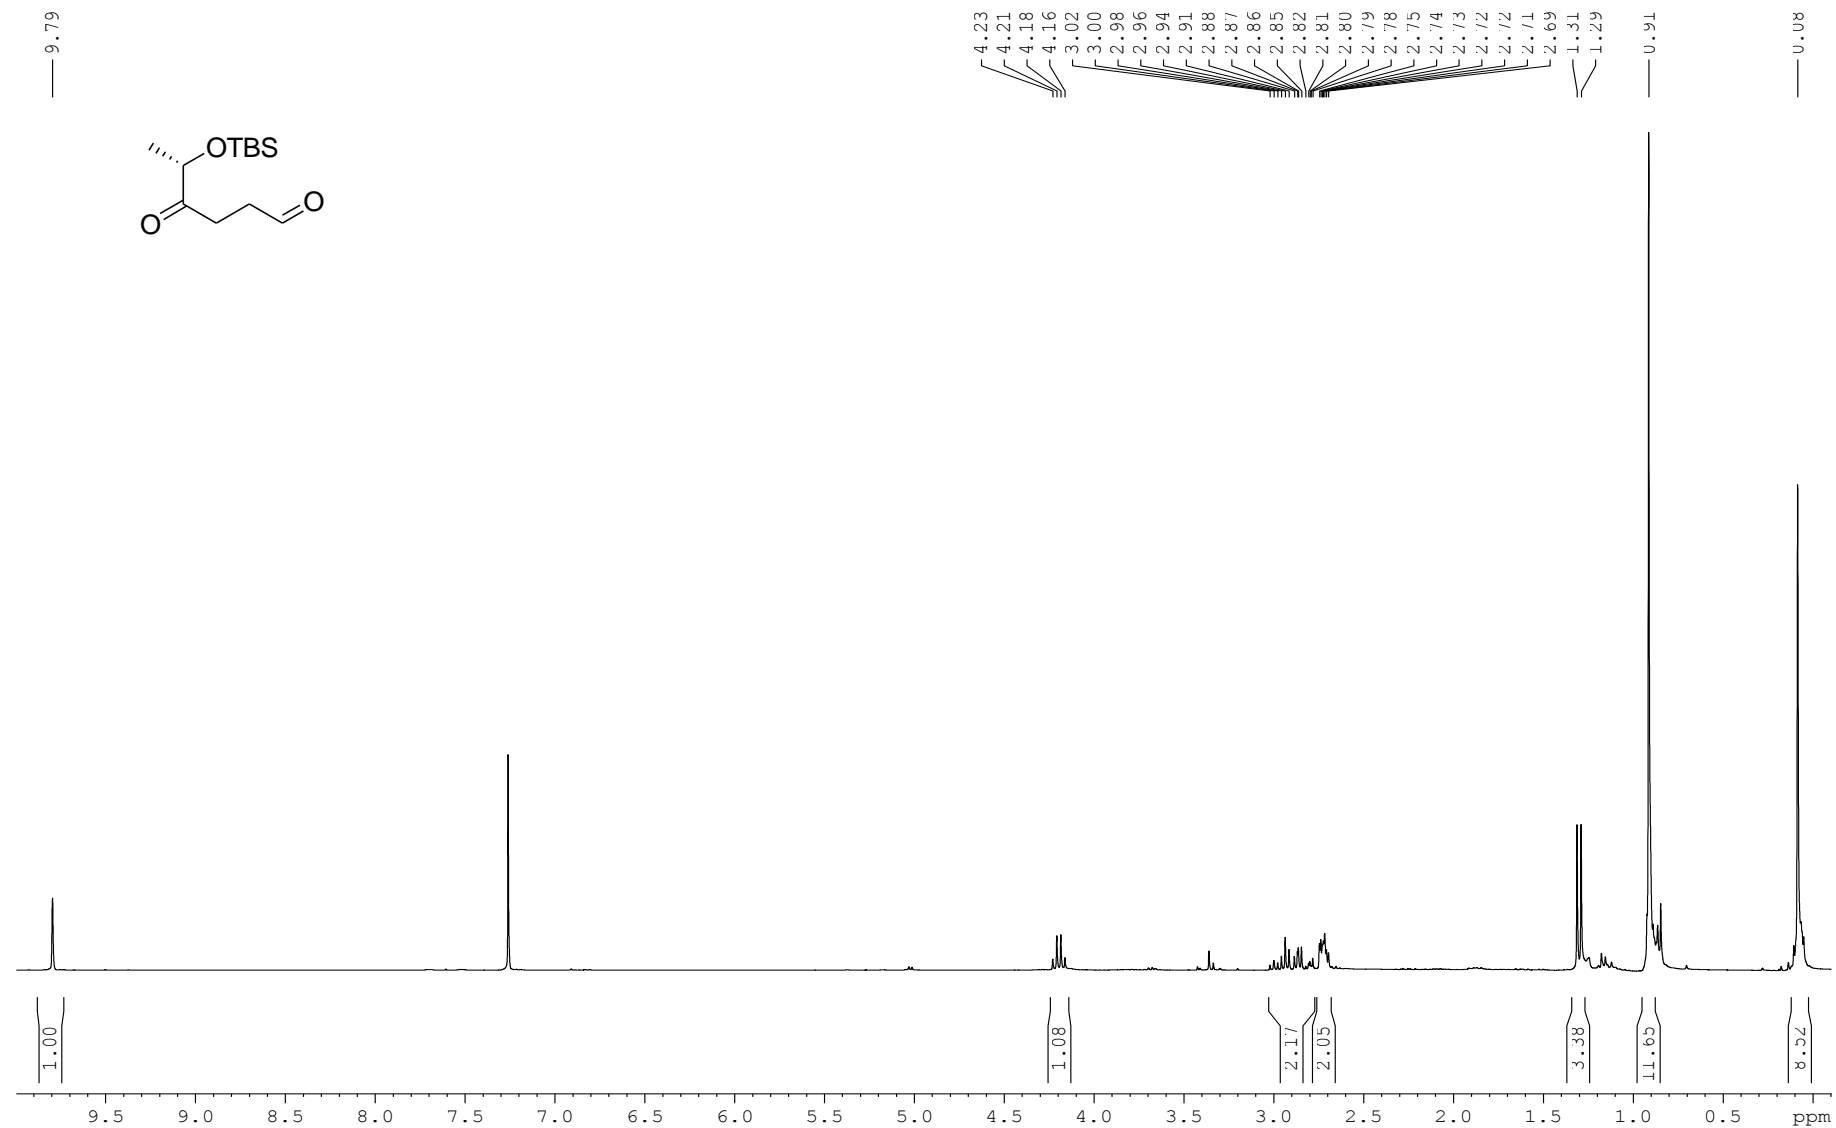

$^{13}\text{C}$  NMR-APT ( $\text{CDCl}_3$ , 75 MHz) of **22**

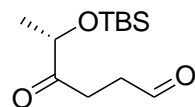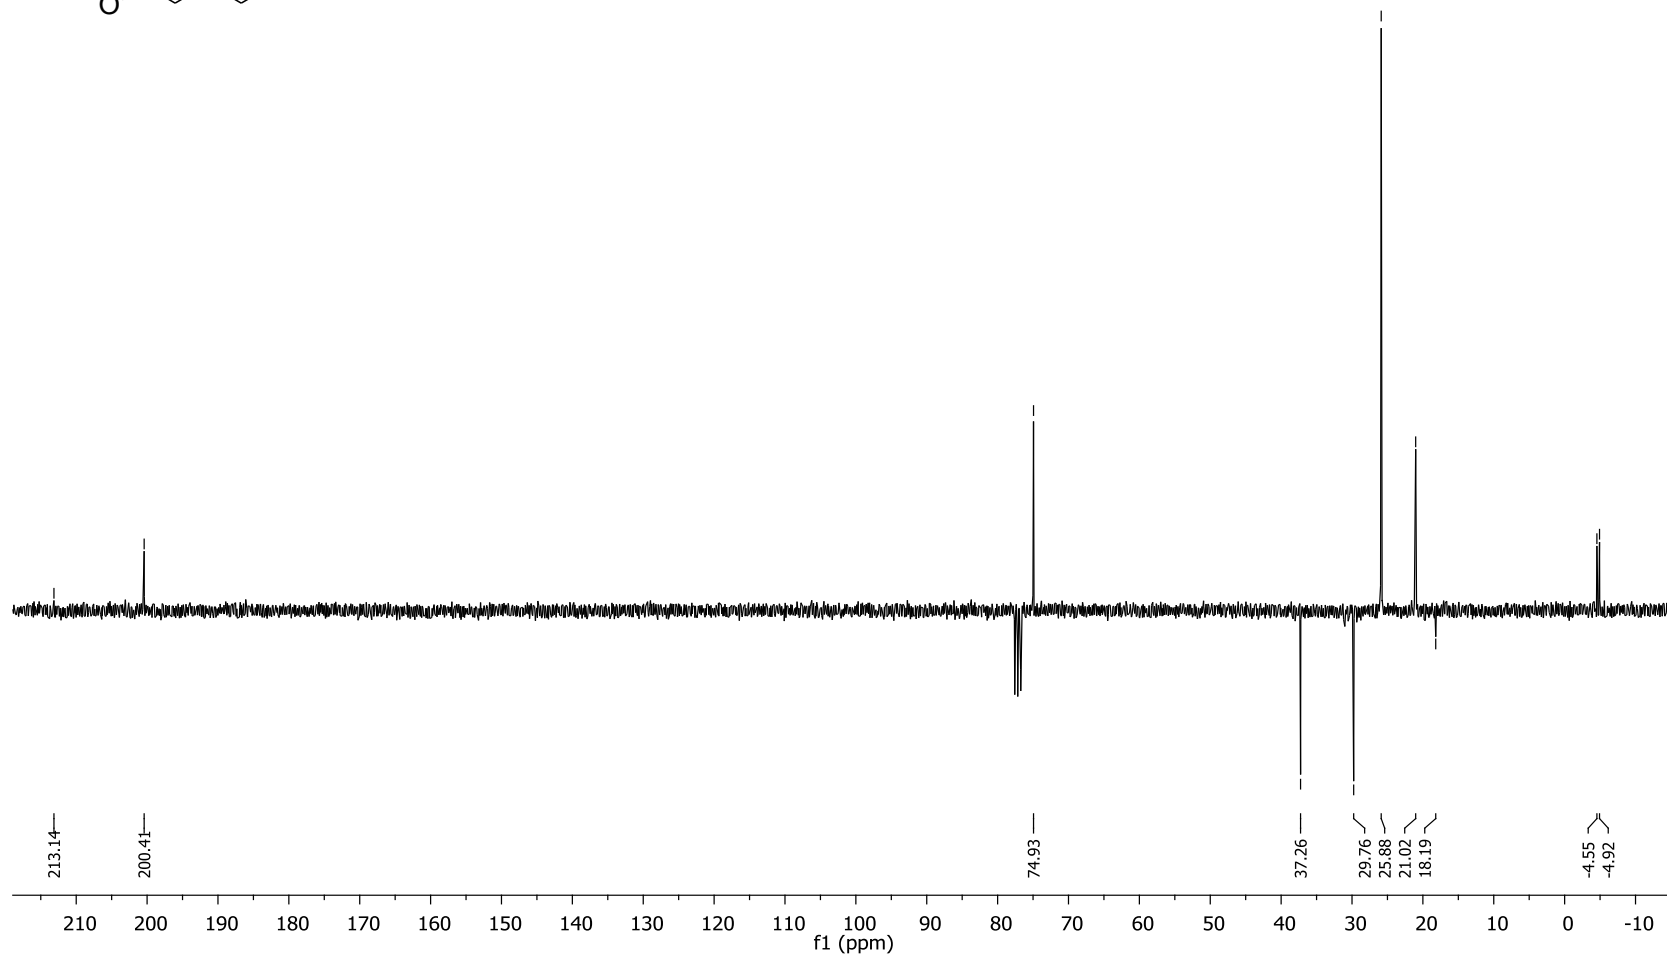

$^1\text{H}$  NMR ( $\text{CDCl}_3$ , 300 MHz) of **23**

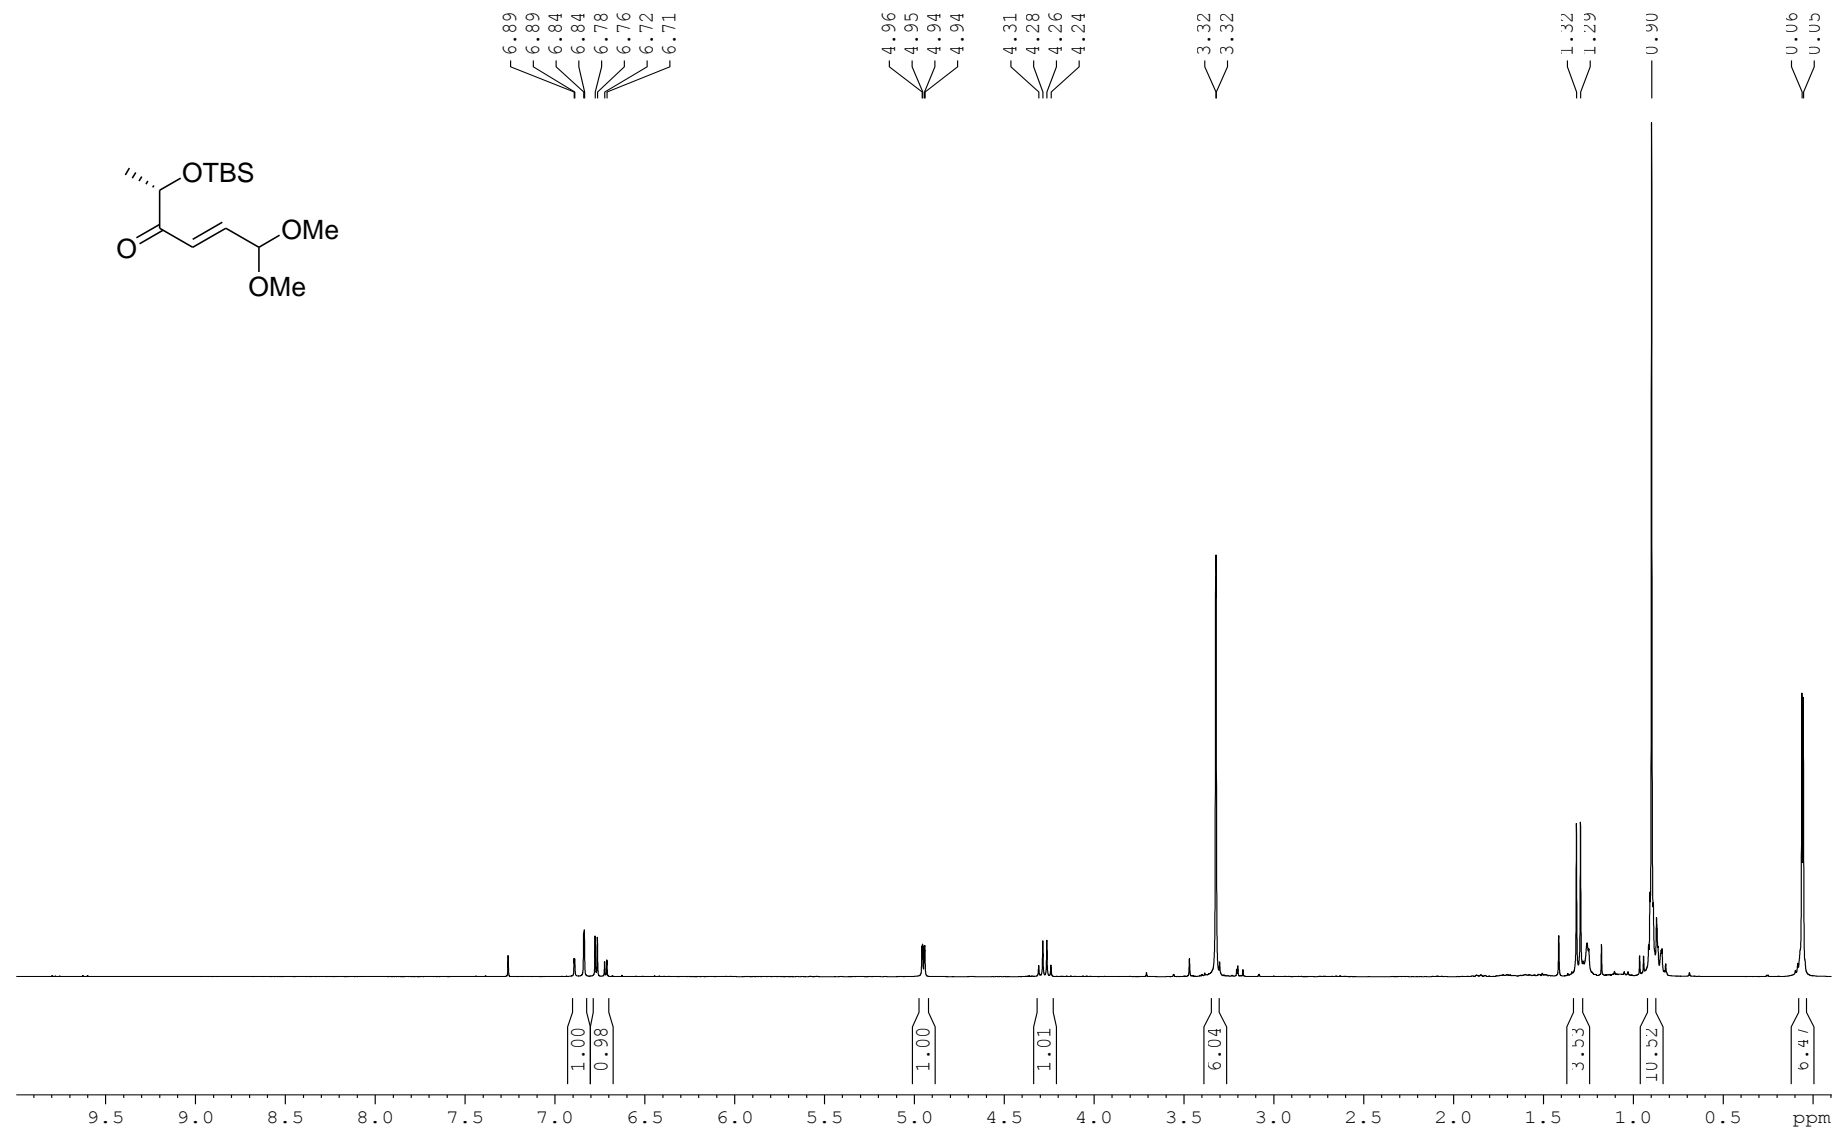

$^{13}\text{C}$  NMR-APT ( $\text{CDCl}_3$ , 75 MHz) of **23**

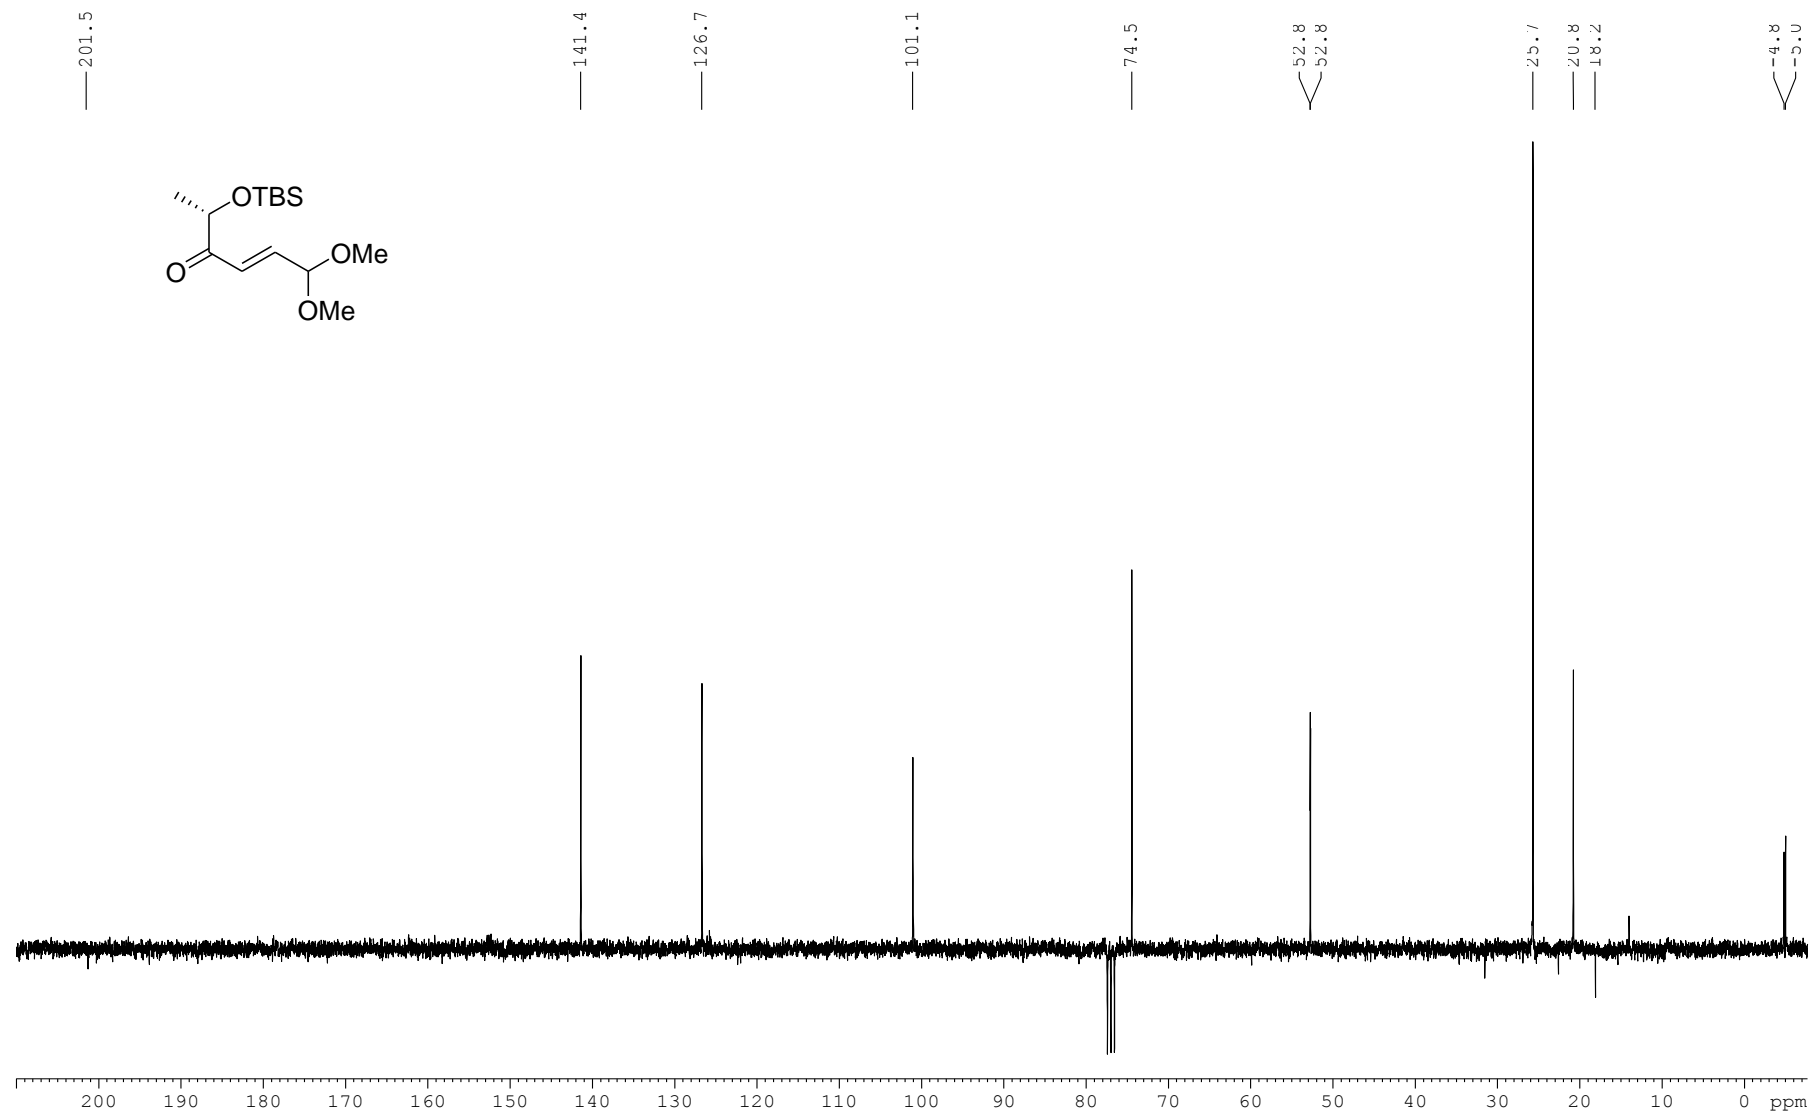

$^1\text{H}$  NMR ( $\text{CDCl}_3$ , 300 MHz) of **24**

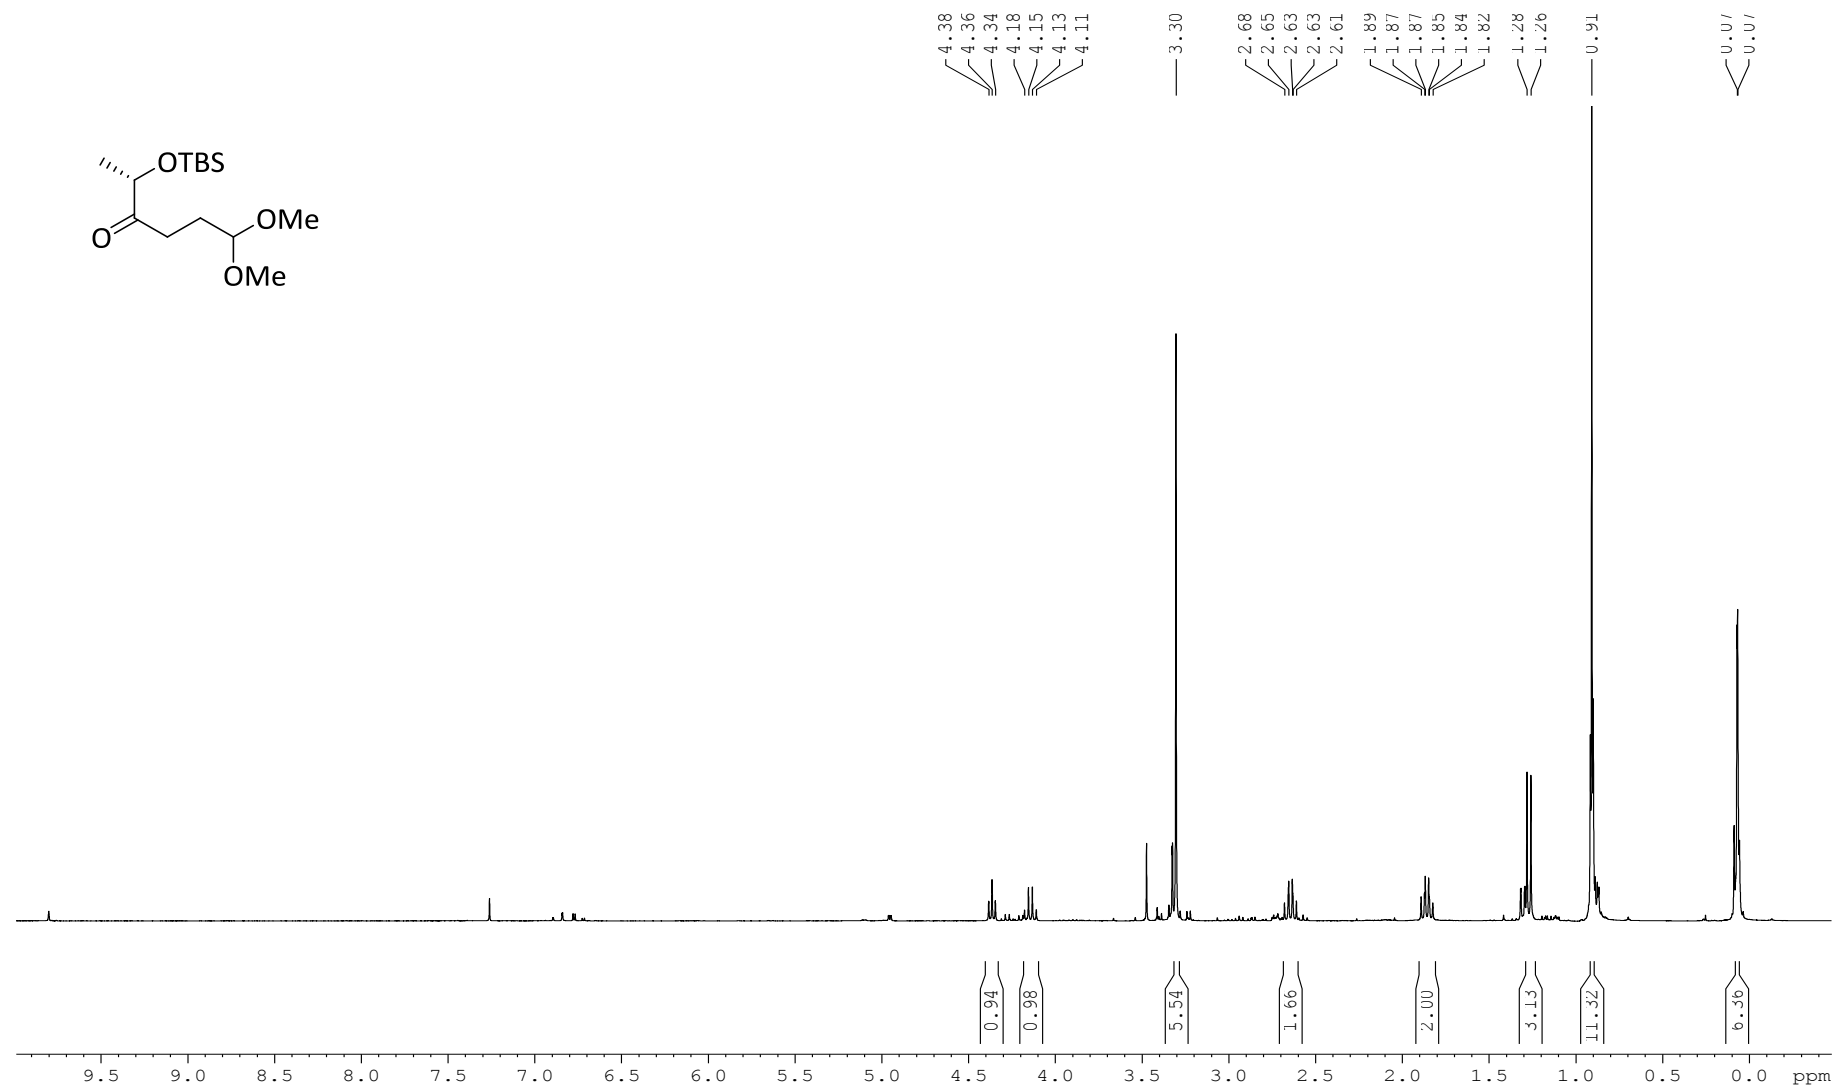



$^{13}\text{C}$  NMR ( $\text{CDCl}_3$ , 75 MHz) of **24**

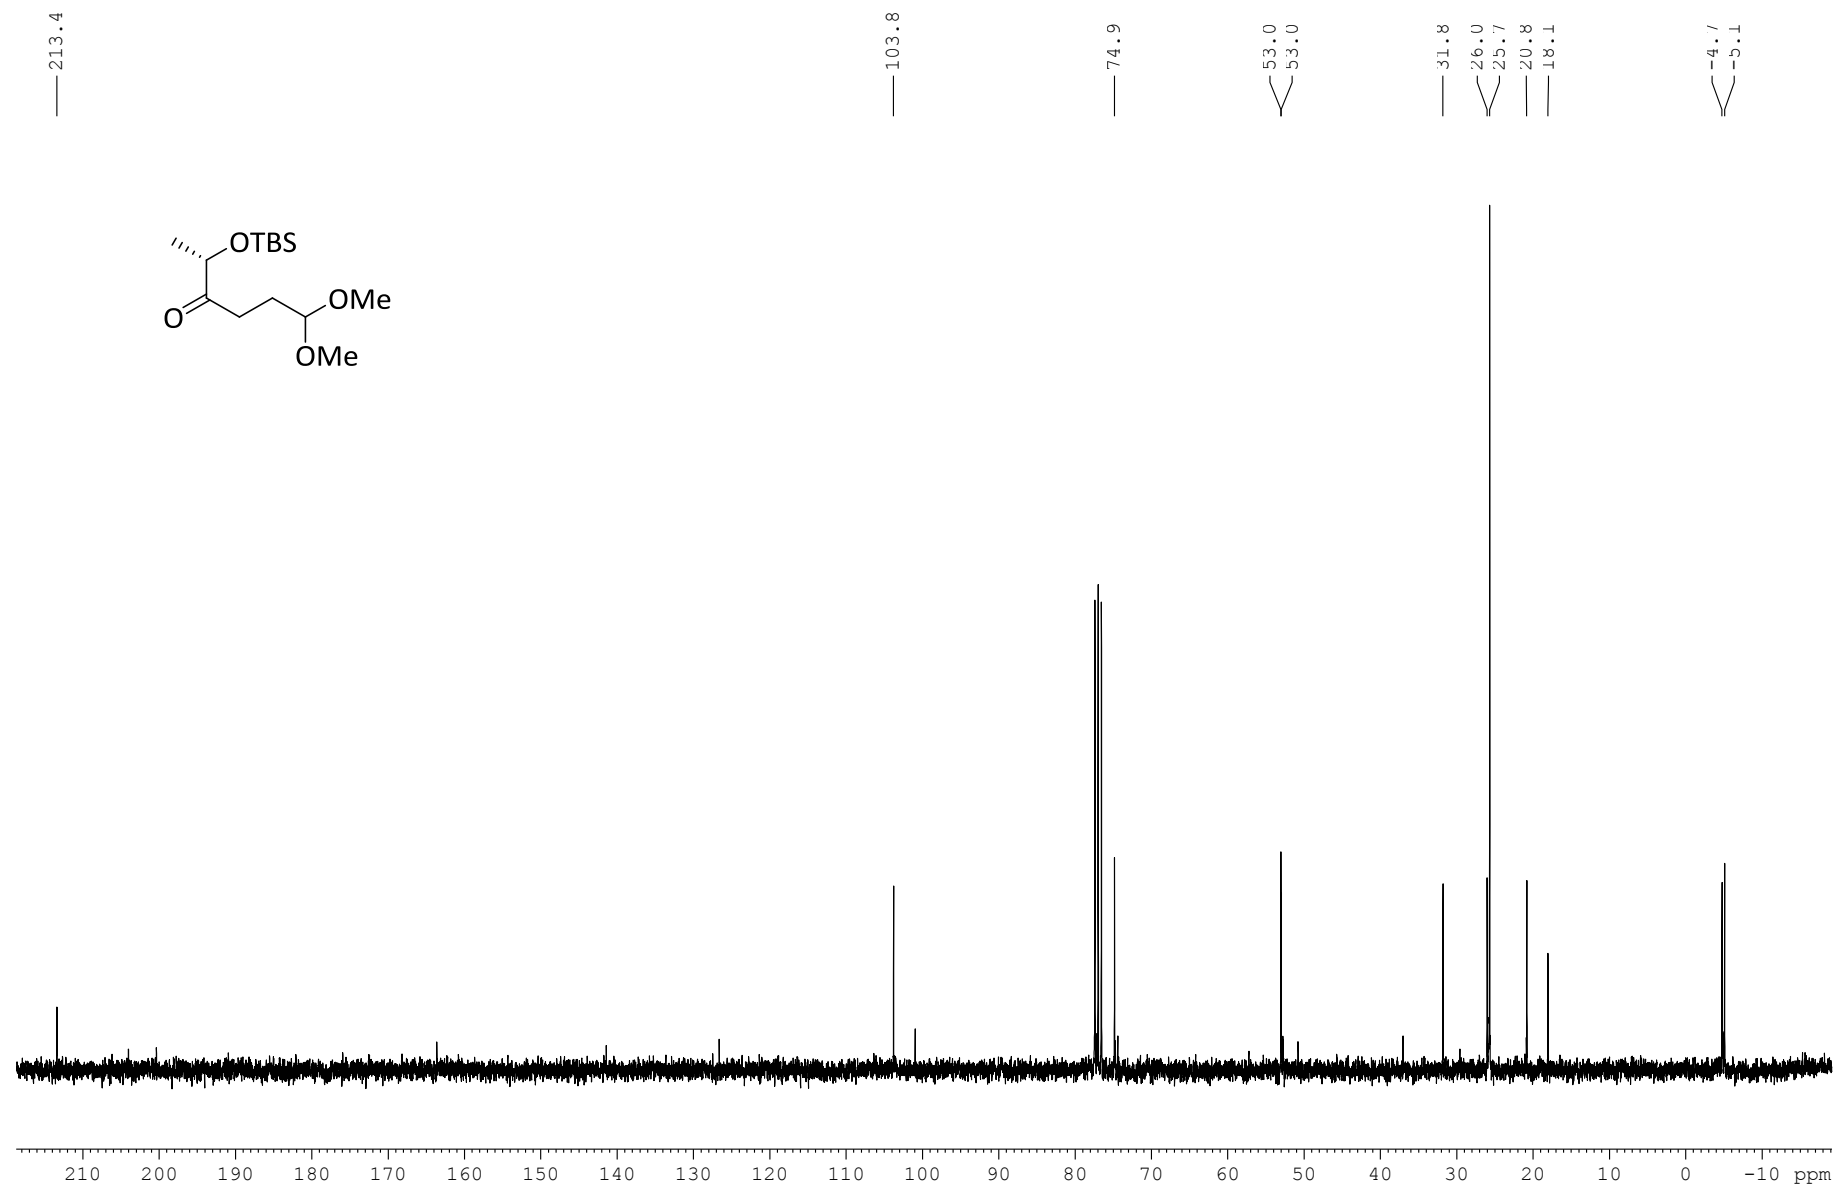

$^1\text{H}$  NMR ( $\text{CDCl}_3$ , 300 MHz) for the mixture obtained from deprotection of **24**

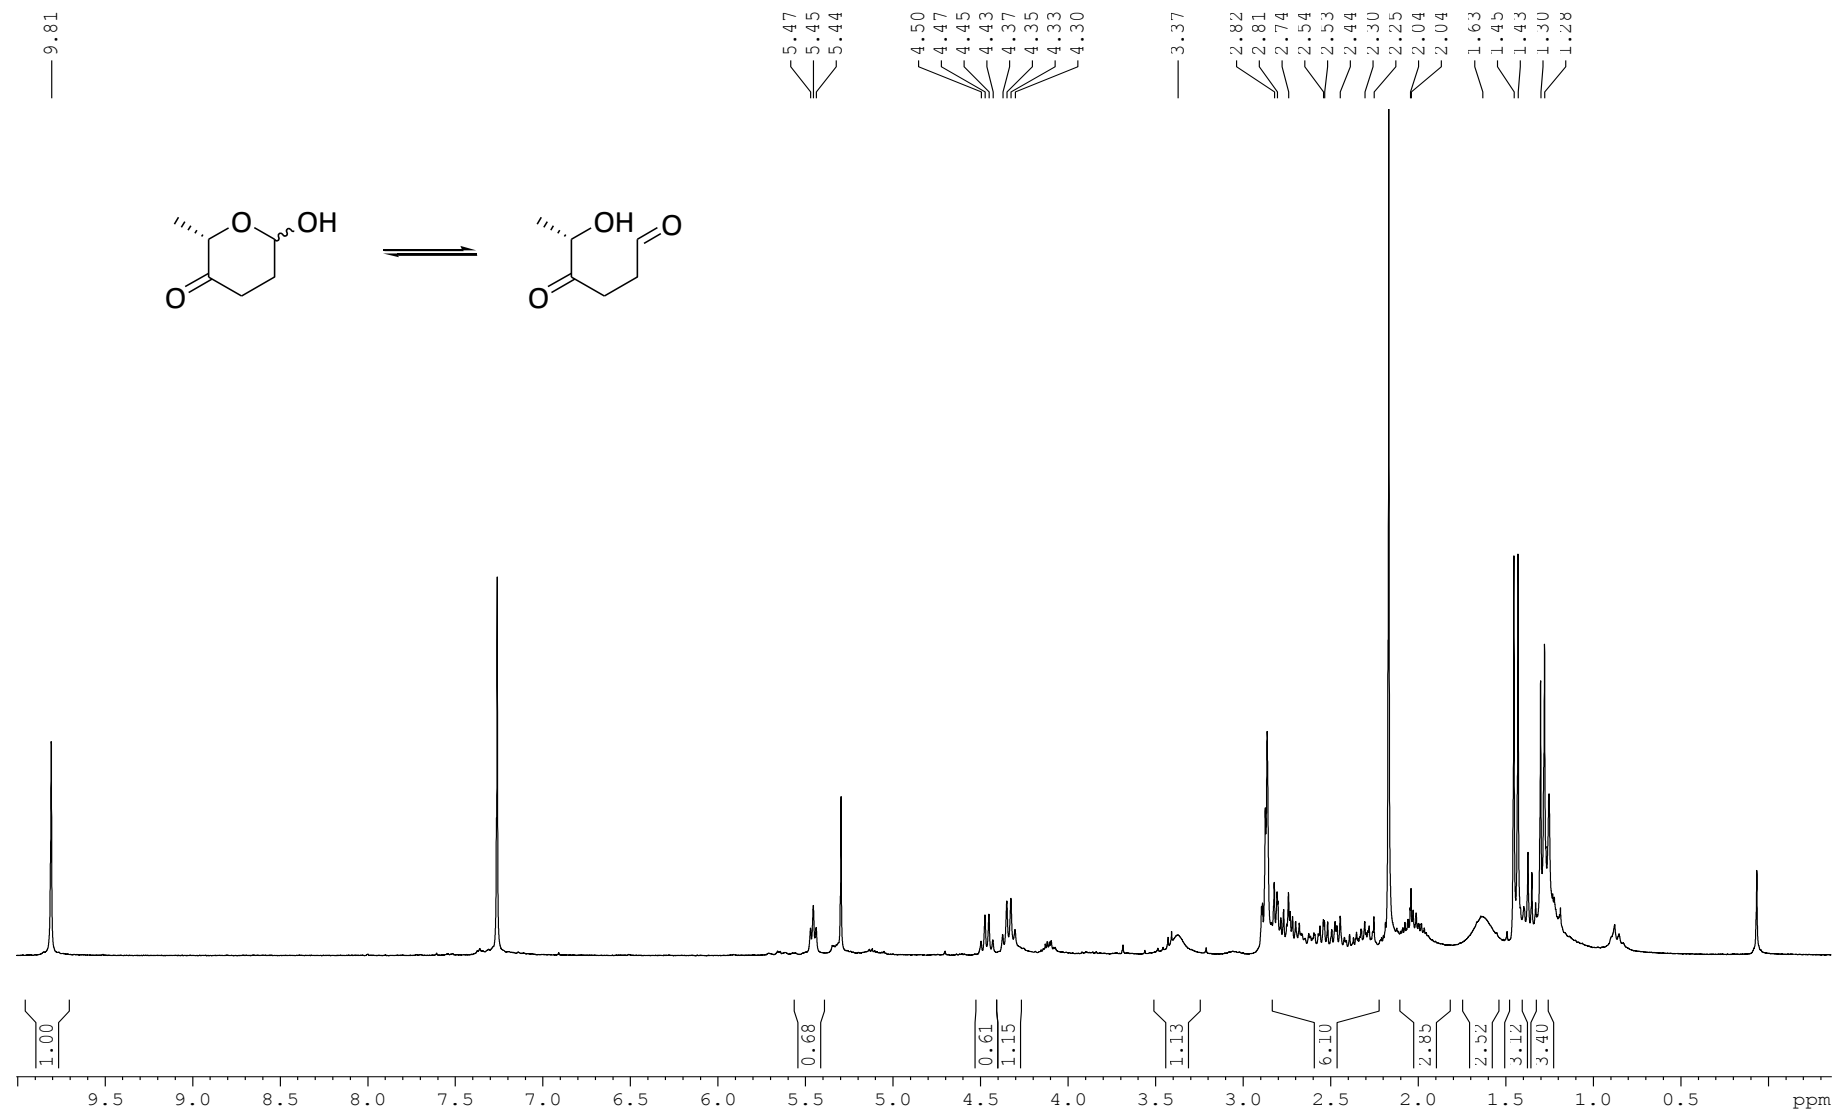

Supplement: Beilstein_J_Org_Chem-10-1023-s002.pdf [file Beilstein_J_Org_Chem-10-1023-s002.pdf]
